# Supplementary material
Source: publisher figshare collection journal article supplement (https://karger.figshare.com/ndownloader/files/14720345)
Supplement: Supplementary file 1 [file 14720345]

## **SUPPLEMENTARY MATERIALS**

**Feasibility and acceptability of an intervention providing computer-generated tailored feedback to target alcohol consumption and depressive symptoms in proactively recruited health care patients and reactively recruited media volunteers – results of a pilot study**

Kristian Krause, Diana Guertler, Anne Moehring, Anil Batra, Sandra Eck, Hans-Jürgen Rumpf, Gallus Bischof, Michael Lucht, Jennis Freyer-Adam, Sabina Ulbricht, Ulrich John, Christian Meyer

## Table of contents

|                                                                                                                                                                           |           |
|---------------------------------------------------------------------------------------------------------------------------------------------------------------------------|-----------|
| <b>Supplementary Tables.....</b>                                                                                                                                          | <b>3</b>  |
| <b>Supplementary Table 1:</b> Reasons for dropping out from screening to baseline for health care patients by setting.....                                                | 3         |
| <b>Supplementary Table 2:</b> Basic intervention characteristics.....                                                                                                     | 4         |
| <b>Supplementary Table 3:</b> Contents of the written feedback letters and what they were tailored by.....                                                                | 5         |
| <b>Supplementary Table 4:</b> Assessment of alcohol consumption with the original AUDIT consumption items and its adaptations.....                                        | 8         |
| <b>Supplementary Table 5:</b> Frequencies of the different motivational stages of change concerning alcohol consumption in the overall sample and the two subsamples..... | 10        |
| <b>Supplementary Table 6:</b> Percentage of participants in each motivational stage at baseline and 6-month follow-up for each depression preventive behavior.....        | 11        |
| <b>Supplementary Figures.....</b>                                                                                                                                         | <b>12</b> |
| <b>Supplementary Figure 1:</b> Graphical representation of the course of the intervention.....                                                                            | 12        |
| <b>Supplementary Figure 2:</b> Graphical representation of the staging algorithms used.....                                                                               | 13        |
| <b>Written intervention description.....</b>                                                                                                                              | <b>14</b> |
| <b>Example feedback letters.....</b>                                                                                                                                      | <b>17</b> |
| <b>Participant A:</b> Letter 1.....                                                                                                                                       | 17        |
| <b>Participant A:</b> Letter 2.....                                                                                                                                       | 21        |
| <b>Participant A:</b> Letter 3.....                                                                                                                                       | 24        |
| <b>Participant A:</b> Letter 4.....                                                                                                                                       | 28        |
| <b>Participant A:</b> Letter 5.....                                                                                                                                       | 32        |
| <b>Participant A:</b> Letter 6.....                                                                                                                                       | 36        |
| <b>Participant B:</b> Letter 1.....                                                                                                                                       | 40        |
| <b>Participant B:</b> Letter 2.....                                                                                                                                       | 44        |
| <b>Participant B:</b> Letter 3.....                                                                                                                                       | 47        |
| <b>Participant B:</b> Letter 4.....                                                                                                                                       | 51        |
| <b>Participant B:</b> Letter 5.....                                                                                                                                       | 55        |
| <b>Participant B:</b> Letter 6.....                                                                                                                                       | 59        |
| <b>References.....</b>                                                                                                                                                    | <b>63</b> |

**Supplementary Table 1:** Reasons for dropping out from screening to baseline for health care patients by setting

|                                                                   | General hospitals | General practitioners offices |
|-------------------------------------------------------------------|-------------------|-------------------------------|
| <b>Screening completed</b>                                        | 1250 (100)        | 1523 (100)                    |
| Thereof:                                                          |                   |                               |
| Neither hazardous drinking nor depressive symptoms                | 847 (67.8)        | 964 (63.3)                    |
| Hazardous drinking without depressive symptoms                    | 216 (17.3)        | 258 (16.9)                    |
| Depressive symptoms without hazardous drinking                    | 156 (12.5)        | 242 (15.9)                    |
| Inclusion criteria met (hazardous drinking + depressive symptoms) | 31 (2.5)          | 59 (3.9)                      |
| Thereof:                                                          |                   |                               |
| ≥1 exclusion criteria met                                         | 15 (48.4)         | 20 (33.9)                     |
| Suspected severe depression                                       | 3 (9.7)           | 3 (5.1)                       |
| Moderate or severe alcohol use disorder                           | 9 (29.0)          | 8 (13.6)                      |
| Seeing a psychotherapist                                          | 10 (32.3)         | 13 (22.0)                     |
| No weekly internet and smartphone use                             | 0 (0.0)           | 0 (0.0)                       |
| Theoretical amount of eligible patients <sup>1</sup>              | 16 (51.6)         | 39 (66.1)                     |
| Thereof:                                                          |                   |                               |
| “Lost” due to:                                                    |                   |                               |
| Initial inclusion criteria                                        | 5 (31.3)          | 3 (7.7)                       |
| Assignment to Project 2                                           | 0 (0.0)           | 6 (15.4)                      |
| Participation offered                                             | 11 (68.8)         | 30 (76.9)                     |
| Thereof:                                                          |                   |                               |
| Did not consent                                                   | 4 (36.4)          | 10 (33.3)                     |
| Consented to participate                                          | 7 (63.3)          | 20 (66.7)                     |
| Thereof:                                                          |                   |                               |
| Unwilling to participate                                          | 1 (14.3)          | 2 (10.0)                      |
| Unreachable                                                       | 0 (0.0)           | 5 (25.0)                      |
| <b>Baseline completed</b>                                         | 6 (31.6)          | 13 (68.4)                     |

Note. Data are presented as n (%).

<sup>1</sup>: considering the final inclusion criteria.

**Supplementary Table 2:** Basic intervention characteristics

|                                        |                                                                                 |
|----------------------------------------|---------------------------------------------------------------------------------|
| <b>Behavioral target</b>               | Hazardous drinking,<br>Depression <sup>1</sup>                                  |
| <b>Target population</b>               | Adults aged 18-64                                                               |
| <b>Intended setting</b>                | Primary care                                                                    |
| <b>Access</b>                          | facilitated by proactively approaching individuals in the<br>intended setting   |
| <b>Language</b>                        | German                                                                          |
| <b>Type of technology</b>              | Computer-based expert system [1]                                                |
| <b>Software platform</b>               | Microsoft Access 2010                                                           |
| <b>Change technique</b>                | Motivational feedback                                                           |
| <b>Theoretical basis</b>               | Transtheroretical model of behavior change (TTM) [2]                            |
| <b>Tailoring</b>                       | Yes <sup>2</sup>                                                                |
| <b>Mode of assessment</b>              | Proactive CATIs at 3 time points (baseline, month 2, month 4)                   |
| <b>Method of intervention delivery</b> | Written postal feedback letters <sup>3</sup> ,<br>SMS or e-mail <sup>4, 5</sup> |
| <b>Counselor involvement</b>           | None                                                                            |
| <b>Cost to user</b>                    | None                                                                            |
| <b>Intervention duration</b>           | 6 months                                                                        |

*Note.* CATI: computer-assisted telephone interview.

<sup>1</sup>: Depressive symptoms were targeted by motivating participants to implement evidence-based depression preventive or ameliorating behaviors into their daily routine [3]; <sup>2</sup>: Supplementary Table 3 provides an overview over the sections of the letters and what they were tailored by, <sup>3</sup>: six letters in total, two after baseline, 2 months, and 4 months, respectively, <sup>4</sup>: depending on availability; e-mail was chosen if participants did not use a mobile phone at least once a week, <sup>5</sup>: one message per week over a period of 6 months.

**Supplementary Table 3:** Contents of the written feedback letters and what they were tailored by

| Section                                                                                               | Tailored by                                                                                                                                                                                                                                                                                                                                                                                             |
|-------------------------------------------------------------------------------------------------------|---------------------------------------------------------------------------------------------------------------------------------------------------------------------------------------------------------------------------------------------------------------------------------------------------------------------------------------------------------------------------------------------------------|
| <b>Letter 1, 3, 5</b>                                                                                 |                                                                                                                                                                                                                                                                                                                                                                                                         |
| Introduction                                                                                          | ➤ Recruitment setting (Letter 1 only)                                                                                                                                                                                                                                                                                                                                                                   |
| <b>Depression module</b>                                                                              |                                                                                                                                                                                                                                                                                                                                                                                                         |
| Feedback on depressive symptoms <sup>#</sup>                                                          | <ul style="list-style-type: none"> <li>➤ Recruitment setting</li> <li>➤ Currency of depressive symptoms</li> <li>➤ Number (one or more) and severity of depressive symptoms</li> </ul>                                                                                                                                                                                                                  |
| Introduction of depression preventive behaviors                                                       | ➤ generic                                                                                                                                                                                                                                                                                                                                                                                               |
| Feedback on the motivational stage of change to practice depression preventive behaviors <sup>#</sup> | <ul style="list-style-type: none"> <li>➤ Overall motivational stage of change to practice depression prevention<sup>1</sup></li> <li>➤ Number of depression preventive behaviors in the stage that represents the current overall motivational stage of change to practice depression prevention</li> <li>➤ Motivational stage of change of each of the five depression preventive behaviors</li> </ul> |
| Information on prevalence <sup>2</sup> , course, and additional health risks of depressive symptoms   | <ul style="list-style-type: none"> <li>➤ Age</li> <li>➤ Sex</li> <li>➤ Currency of depressive symptoms</li> <li>➤ Number (one or more) and severity of depressive symptoms</li> <li>➤ Overall motivational stage of change to practice depression prevention</li> </ul>                                                                                                                                 |
| Information on the interaction of alcohol and depression (Letter 1 only)                              | ➤ generic                                                                                                                                                                                                                                                                                                                                                                                               |
| Connecting passage (Letters 3 and 5 only)                                                             | ➤ generic                                                                                                                                                                                                                                                                                                                                                                                               |
| <b>Alcohol module</b>                                                                                 |                                                                                                                                                                                                                                                                                                                                                                                                         |
| Feedback on the motivational stage of change to reduce alcohol intake <sup>#</sup>                    | ➤ Motivational stage of change to reduce alcohol intake                                                                                                                                                                                                                                                                                                                                                 |
| Introduction of the boundaries of low-risk drinking                                                   | <ul style="list-style-type: none"> <li>➤ Sex</li> <li>➤ Age</li> <li>➤ Weekly consumption days</li> </ul>                                                                                                                                                                                                                                                                                               |
| Normative feedback on alcohol intake <sup>3,#</sup>                                                   | <ul style="list-style-type: none"> <li>➤ Sex</li> <li>➤ Number of drinks per week</li> </ul>                                                                                                                                                                                                                                                                                                            |
| Feedback on personal risk of experiencing negative consequences of consuming alcohol <sup>#</sup>     | <ul style="list-style-type: none"> <li>➤ Sex</li> <li>➤ Number of drinks per week</li> <li>➤ Frequency of binge drinking</li> </ul>                                                                                                                                                                                                                                                                     |
| Feedback on experienced pros and cons of consuming alcohol (alcohol decisional balance) <sup>#</sup>  | ➤ Experienced pros and cons of consuming alcohol                                                                                                                                                                                                                                                                                                                                                        |

**Supplementary Table 3 (continued):** Contents of the written feedback letters and what they were tailored by

| Section                                                                            | Tailored by                                                                                                                                                                                                                                                                                                                                                                                                                                                          |
|------------------------------------------------------------------------------------|----------------------------------------------------------------------------------------------------------------------------------------------------------------------------------------------------------------------------------------------------------------------------------------------------------------------------------------------------------------------------------------------------------------------------------------------------------------------|
| Farewell passage <sup>#</sup>                                                      | ➤ Motivational stages of change to reduce alcohol intake and to practice depression prevention                                                                                                                                                                                                                                                                                                                                                                       |
| <b>Brief 2,4,6</b>                                                                 |                                                                                                                                                                                                                                                                                                                                                                                                                                                                      |
| Introduction                                                                       | ➤ generic                                                                                                                                                                                                                                                                                                                                                                                                                                                            |
| <b>Depression module</b>                                                           |                                                                                                                                                                                                                                                                                                                                                                                                                                                                      |
| Feedback on the motivational stage of change to practice depression prevention     | <ul style="list-style-type: none"> <li>➤ Overall motivational stage of change to practice depression prevention<sup>1</sup></li> <li>➤ Number of depression preventive behaviors in the stage that represents the current overall motivational stage of change to practice depression prevention</li> <li>➤ Motivational stage of change of each of the five depression preventive behaviors</li> </ul>                                                              |
| Feedback on outcome expectations of practicing depression prevention <sup>#</sup>  | <ul style="list-style-type: none"> <li>➤ Overall motivational stage of change to practice depression prevention<sup>1</sup></li> <li>➤ Number of depression preventive behaviors in the stage that represents the current overall motivational stage of change to practice depression prevention</li> <li>➤ Overall outcome expectation of practicing depression prevention and outcome expectations for each of the five depression preventive behaviors</li> </ul> |
| Feedback on processes of change <sup>4,#</sup>                                     | <ul style="list-style-type: none"> <li>➤ Overall motivational stage of change to practice depression prevention<sup>1</sup></li> <li>➤ Reported use of the processes of change</li> </ul>                                                                                                                                                                                                                                                                            |
| Feedback on self-efficacy to use depression preventive behaviors <sup>#</sup>      | <ul style="list-style-type: none"> <li>➤ Overall motivational stage of change to practice depression prevention<sup>1</sup></li> <li>➤ Number of depression preventive behaviors in the stage that represents the current overall motivational stage of change to practice depression prevention</li> <li>➤ Overall self-efficacy to use depression preventive behaviors and self-efficacy to use each of the five behaviors</li> </ul>                              |
| Making a plan (only for preparators)                                               | <ul style="list-style-type: none"> <li>➤ Sex</li> <li>➤ Number of behaviors in the preparation stage</li> <li>➤ The behavior in preparation</li> </ul>                                                                                                                                                                                                                                                                                                               |
| Connecting passage                                                                 | ➤ generic                                                                                                                                                                                                                                                                                                                                                                                                                                                            |
| <b>Alcoholmodul</b>                                                                |                                                                                                                                                                                                                                                                                                                                                                                                                                                                      |
| Feedback on processes of change <sup>4,#</sup>                                     | <ul style="list-style-type: none"> <li>➤ Motivational stage of change to reduce alcohol intake</li> <li>➤ Reported use of the processes of change</li> </ul>                                                                                                                                                                                                                                                                                                         |
| Feedback on self-efficacy to not drink alcohol in critical situations <sup>#</sup> | <ul style="list-style-type: none"> <li>➤ Motivational stage of change to reduce alcohol intake</li> <li>➤ Self-efficacy to not drink alcohol in tempting situations</li> </ul>                                                                                                                                                                                                                                                                                       |
| Making a plan (only for preparators)                                               | ➤ Sex                                                                                                                                                                                                                                                                                                                                                                                                                                                                |

**Supplementary Table 3 (continued):** Contents of the written feedback letters and what they were tailored by.

| Farewell passage                                                                                                                                                                                                                                                                                                                                                                                                                                                                                                                                                                                                                                                                                                                                                                                     | ➤ Communication channel for the weekly short-messages |
|------------------------------------------------------------------------------------------------------------------------------------------------------------------------------------------------------------------------------------------------------------------------------------------------------------------------------------------------------------------------------------------------------------------------------------------------------------------------------------------------------------------------------------------------------------------------------------------------------------------------------------------------------------------------------------------------------------------------------------------------------------------------------------------------------|-------------------------------------------------------|
| <p>Note. <sup>1</sup>: resembles the motivational stage of change of the depression preventive behavior(s) for which the participant presents the highest motivational stage of change, <sup>2</sup>: participants received feedback on the percentage of men and women in their age range that also suffer from depressive symptoms (based on point prevalences from Busch et al. [4]), <sup>3</sup>: Comparison of the alcohol intake with a normative database of individuals in the same motivational stage of change, <sup>4</sup>: Feedback on processes of change was partly given via SMS/e-mail, a random algorithm decided which processes of change were thematised in the letter and which in the SMS/e-mail, #: at T1 and T2 feedback also included feedback on individual changes.</p> |                                                       |

**Supplementary Table 4:** Assessment of alcohol consumption with the original AUDIT consumption items and its adaptations

|                                                                                                                  |                                                                                                                                                                                                                                                                                                                                                                            |
|------------------------------------------------------------------------------------------------------------------|----------------------------------------------------------------------------------------------------------------------------------------------------------------------------------------------------------------------------------------------------------------------------------------------------------------------------------------------------------------------------|
| <b>AUDIT 1 original<sup>1</sup></b>                                                                              |                                                                                                                                                                                                                                                                                                                                                                            |
| <b><i>How often do you have a drink containing alcohol?</i></b>                                                  | Never<br>Monthly or less<br>Two to four times a month<br>Two to three times a week<br>Four or more times a week                                                                                                                                                                                                                                                            |
| <b>AUDIT 1 continuous<sup>2</sup></b>                                                                            |                                                                                                                                                                                                                                                                                                                                                                            |
| <b><i>And how often exactly do you have a drink containing alcohol?</i></b>                                      | [if AUDIT 1 → Two to four times a month]<br>Two times a month<br>Three times a month<br>Four times a month<br><br>[if AUDIT 1 → Two to three times a week]<br>Two times a week<br>Three times a week<br><br>[if AUDIT 1 → Four or more times a week]<br>Four times a week<br>Five times a week<br>Six times a week<br>Seven times a week                                   |
| <b>AUDIT 2 original</b>                                                                                          |                                                                                                                                                                                                                                                                                                                                                                            |
| <b><i>How many drinks containing alcohol do you have on a typical day when you are drinking?</i></b>             | 1 or 2<br>3 or 4<br>5 or 6<br>7 to 9<br>10 or more                                                                                                                                                                                                                                                                                                                         |
| <b>AUDIT 2 continuous</b>                                                                                        |                                                                                                                                                                                                                                                                                                                                                                            |
| <b><i>And how many drinks containing alcohol do you have exactly on a typical day when you are drinking?</i></b> | [if AUDIT 2 → 1 or 2]<br>1 drink per day<br>2 drinks per day<br><br>[if AUDIT 2 → 3 or 4]<br>3 drinks per day<br>4 drinks per day<br><br>[if AUDIT 2 → 5 or 6]<br>5 drinks per day<br>6 drinks per day<br><br>[if AUDIT 2 → 7 to 9]<br>7 drinks per day<br>8 drinks per day<br>9 drinks per day<br><br>[if AUDIT 2 → 10 or more]<br>10 drinks per day<br>11 drinks per day |



**Supplementary Table 4 (continued):** Assessment of alcohol consumption with the original AUDIT consumption items and its adaptations

|                                                                               |                                                   |
|-------------------------------------------------------------------------------|---------------------------------------------------|
|                                                                               | 12 drinks per day                                 |
|                                                                               | ....                                              |
|                                                                               | 65 drinks per day                                 |
| <hr/>                                                                         |                                                   |
| <b>AUDIT 3 gendered</b>                                                       |                                                   |
| Women:                                                                        | Never                                             |
| <b>How often do you have four or more drinks on one occasion?</b>             | Less than monthly                                 |
|                                                                               | Monthly                                           |
|                                                                               | Two to four times a month                         |
| Men:                                                                          | Two to three times a week                         |
| <b>How often do you have five or more drinks on one occasion?</b>             | Four or more times a week                         |
| <hr/>                                                                         |                                                   |
| <b>AUDIT 3 gendered continuous<sup>3</sup></b>                                |                                                   |
| Women:                                                                        | [if AUDIT 3 gendered → Two to four times a month] |
| <b>And how often exactly do you have four or more drinks on one occasion?</b> | Two times a month                                 |
|                                                                               | Three times a month                               |
|                                                                               | Four times a month                                |
| Men:                                                                          |                                                   |
| <b>And how often exactly do you have five or more drinks on one occasion?</b> | [if AUDIT 3 gendered → Two to three times a week] |
|                                                                               | Two times a week                                  |
|                                                                               | Three times a week                                |
|                                                                               |                                                   |
|                                                                               | [if AUDIT 3 gendered → Four or more times a week] |
|                                                                               | Four times a week                                 |
|                                                                               | Five times a week                                 |
|                                                                               | Six times a week                                  |
|                                                                               | Seven times a week                                |
| <hr/>                                                                         |                                                   |
| <b>AUDIT 3 original</b>                                                       |                                                   |
| <b>How often do you have six or more drinks on one occasion?</b>              | Never                                             |
|                                                                               | Less than monthly                                 |
|                                                                               | Monthly                                           |
|                                                                               | Weekly                                            |
|                                                                               | Daily or almost daily                             |

*Note.* AUDIT: Alcohol Use Disorder Identification Test. Questions were asked in the presented order. <sup>1</sup>: if AUDIT 1 original was "Never" the remaining AUDIT questions were not asked; <sup>2</sup>: only asked if AUDIT 1 original was at least "Two to four times a month"; <sup>3</sup>: only asked if AUDIT 3 gendered was at least "Two to four times a month".

**Supplementary Table 5:** Frequencies of the different motivational stages of change concerning alcohol consumption in the overall sample and the two subsamples

| <b>Motivational Stage</b> | <b>All (n = 30)</b> |             | <b>HCPs (n = 15)</b> |             | <b>MVs (n = 15)</b> |             |
|---------------------------|---------------------|-------------|----------------------|-------------|---------------------|-------------|
|                           | <b>BL</b>           | <b>6MFU</b> | <b>BL</b>            | <b>6MFU</b> | <b>BL</b>           | <b>6MFU</b> |
| Precontemplation          | 6 (20.0)            | 6 (20.0)    | 6 (40.0)             | 5 (33.3)    | 0 (0.0)             | 1 (6.7)     |
| Contemplation             | 15 (50.0)           | 8 (26.7)    | 7 (46.7)             | 5 (33.3)    | 8 (53.3)            | 3 (20.0)    |
| Preparation               | 6 (20.0)            | 2 (6.7)     | 0 (0.0)              | 1 (6.7)     | 6 (40.0)            | 1 (6.7)     |
| Action                    | 3 (10.0)            | 14 (46.7)   | 2 (13.3)             | 4 (26.7)    | 1 (6.7)             | 10 (66.7)   |

*Note.* Data are presented as n (%).

HCPs: health care patients; MVs: media recruited volunteers; BL: baseline; 6MFU: 6-month follow-up.

**Supplementary Table 6:** Percentage of participants in each motivational stage at baseline and 6-month follow-up for each depression preventive behavior

| <i>DPB</i>                       | All (n = 30) | HCPs (n = 15) | MVs (n = 15) | All (n = 30)      | HCPs (n = 15) | MVs (n = 15) |
|----------------------------------|--------------|---------------|--------------|-------------------|---------------|--------------|
|                                  | Baseline     |               |              | 6-month follow-up |               |              |
| <b>Help-seeking</b>              |              |               |              |                   |               |              |
| Precontemplation, n (%)          | 4 (13.3)     | 3 (20.0)      | 1 (6.7)      | 4 (13.3)          | 3 (20.0)      | 1 (6.7)      |
| Contemplation, n (%)             | 0 (0.0)      | 0 (0.0)       | 0 (0.0)      | 0 (0.0)           | 0 (0.0)       | 0 (0.0)      |
| Preparation, n (%)               | 2 (6.7)      | 0 (0.0)       | 2 (13.3)     | 1 (3.3)           | 1 (6.7)       | 0 (0.0)      |
| Action, n (%)                    | 24 (80.0)    | 12 (80.0)     | 12 (80.0)    | 25 (83.3)         | 11 (73.3)     | 14 (93.3)    |
| <b>Exercising</b>                |              |               |              |                   |               |              |
| Precontemplation, n (%)          | 10 (33.3)    | 5 (33.3)      | 5 (33.3)     | 7 (23.3)          | 2 (13.3)      | 5 (33.3)     |
| Contemplation, n (%)             | 2 (6.7)      | 1 (6.7)       | 1 (6.7)      | 1 (3.3)           | 1 (6.7)       | 0 (0.0)      |
| Preparation, n (%)               | 11 (36.7)    | 6 (40.0)      | 5 (33.3)     | 10 (33.3)         | 4 (26.7)      | 6 (40.0)     |
| Action, n (%)                    | 7 (23.3)     | 3 (20.0)      | 4 (26.7)     | 12 (40.0)         | 8 (53.3)      | 4 (26.7)     |
| <b>Stress management</b>         |              |               |              |                   |               |              |
| Precontemplation, n (%)          | 5 (16.7)     | 5 (33.3)      | 0 (0.0)      | 6 (20.0)          | 5 (33.3)      | 1 (6.7)      |
| Contemplation, n (%)             | 1 (3.3)      | 0 (0.0)       | 1 (6.7)      | 2 (6.7)           | 0 (0.0)       | 2 (13.3)     |
| Preparation, n (%)               | 8 (26.7)     | 3 (20.0)      | 5 (33.3)     | 6 (20.0)          | 3 (20.0)      | 3 (20.0)     |
| Action, n (%)                    | 16 (53.3)    | 7 (46.7)      | 9 (60.0)     | 16 (53.3)         | 7 (46.7)      | 9 (60.0)     |
| <b>Behavioral activation</b>     |              |               |              |                   |               |              |
| Precontemplation, n (%)          | 4 (13.3)     | 3 (20.0)      | 1 (6.7)      | 2 (6.7)           | 2 (13.3)      | 0 (0.0)      |
| Contemplation, n (%)             | 1 (3.3)      | 1 (6.7)       | 0 (0.0)      | 0 (0.0)           | 0 (0.0)       | 0 (0.0)      |
| Preparation, n (%)               | 9 (30.0)     | 3 (20.0)      | 6 (40.0)     | 4 (13.3)          | 2 (13.3)      | 2 (13.3)     |
| Action, n (%)                    | 16 (53.3)    | 8 (53.3)      | 8 (53.3)     | 24 (80.0)         | 11 (73.3)     | 13 (86.7)    |
| <b>Obviate negative thoughts</b> |              |               |              |                   |               |              |
| Precontemplation, n (%)          | 4 (13.3)     | 4 (26.7)      | 0 (0.0)      | 3 (10.0)          | 2 (13.3)      | 1 (6.7)      |
| Contemplation, n (%)             | 0 (0.0)      | 0 (0.0)       | 0 (0.0)      | 0 (0.0)           | 0 (0.0)       | 0 (0.0)      |
| Preparation, n (%)               | 8 (26.7)     | 2 (13.3)      | 6 (40.0)     | 0 (0.0)           | 0 (0.0)       | 0 (0.0)      |
| Action, n (%)                    | 18 (60.0)    | 9 (60.0)      | 9 (60.0)     | 27 (90.0)         | 13 (86.7)     | 14 (93.3)    |

*Note.* DPB: depression preventive behavior; HCPs: health care patients; MVs: media recruited volunteers.

| WEEK       | 0  | 1  | 2  | 3 | 4 | 5 | 6 | 7 | 8 | 9  | 10 | 11 | 12 | 13 | 14 | 15 | 16 | 17 | 18 | 19 | 20 | 21 | 22 | 23 | 24 | 25 | 26 | 27 | X |
|------------|----|----|----|---|---|---|---|---|---|----|----|----|----|----|----|----|----|----|----|----|----|----|----|----|----|----|----|----|---|
| ASSESSMENT | BL |    |    |   |   |   |   |   |   | T1 |    |    |    |    |    |    | T2 |    |    |    |    |    |    |    |    | FU | PI |    |   |
| LETTER     |    | L1 | L2 |   |   |   |   |   |   |    | L3 | L4 |    |    |    |    |    | L5 | L6 |    |    |    |    |    |    |    |    |    |   |
| SMS/E-MAIL |    | W  |    |   |   |   |   |   |   |    |    |    |    |    |    |    |    |    |    |    |    |    |    |    |    |    | F  |    |   |

**Supplementary Figure 1:** Graphical representation of the course of the intervention. BL: baseline assessment; FU: 6-month follow-up assessment; PI: post-intervention interview; L: letter; W: welcoming message; F: farewell message.

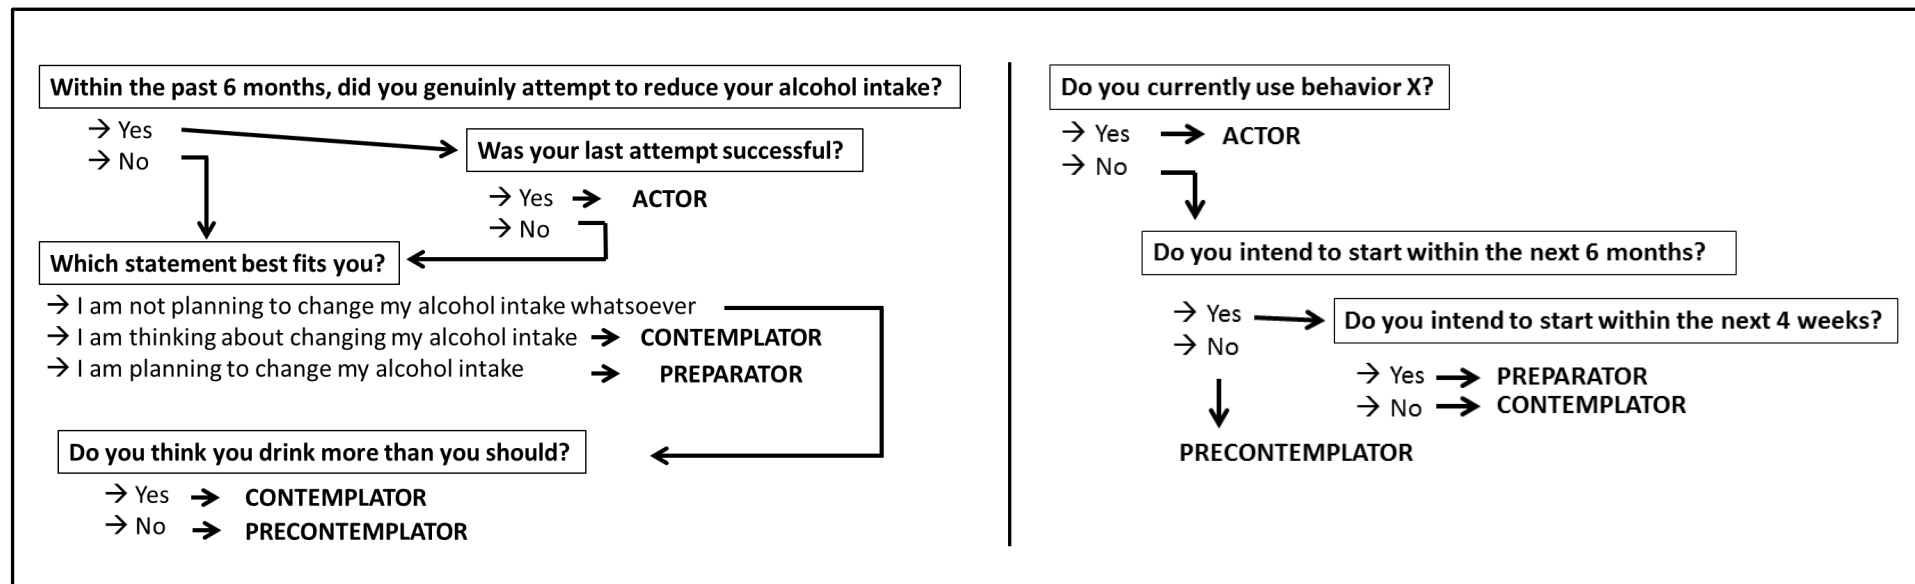

**Supplementary Figure 2:** Graphical representation of the staging algorithms used to assess participants motivational stage to change their drinking behavior (left) and to use each of the depression preventive behaviors (right).

## **Description of the intervention**

The intervention was a computer-based, fully automatized expert system [1] that generated individually tailored motivational feedback letters for participants based on data gathered in computer-assisted telephone interviews. The software platform of our intervention was Microsoft Access (Microsoft Office 2010). Supplementary Table 2 provides an overview on the basic intervention characteristics.

The intervention consisted of an alcohol and a depression module, both based on the transtheoretical model of behavior change [2]. For the alcohol module we relied on an already existing system that has been found to reduce alcohol use among HCPs [5]. Minor modifications have been done to the system for our combined intervention. The depression module was newly developed. It was based on the work of Levesque et al. [3] who addressed depressive symptoms by motivating individuals to implement evidence-based depression preventive or ameliorating behaviors (DPBs) into their daily routine. We adopted this approach but made adjustments concerning the scope of the intervention. Instead of creating a lengthy workbook, we used external links to websites to provide additional information. The primary aim of the intervention was to trigger self-help behavior with a minimal intervention format. Thus, comprehensibility and simplicity were leading principles in choosing and defining DPBs. The five target behaviors chosen were largely congruent to Levesque et al.: 1) obviate negative thoughts [6,7], 2) engage in healthy, pleasant activities on most days [8,9], 3) practice stress management on most days [10-12], 4) exercise on most days [13-15], and 5) getting help (professional or non-professional) when needed. The main differences to Levesque et al. concerned behaviors 1 and 5. Cognitive restructuring was not made a topic of our intervention. We deemed it too complex for an unguided intervention not providing extensive auxiliary material, e.g., a workbook in which this strategy could be thoroughly explained. Instead, we aimed at motivating individuals to apply positive psychology exercises (e.g., the three good things exercise [16]) and to engage in individually meaningful activities (e.g., hobbies or rewarding social behaviors) despite the presence of negative thoughts. We further used a broader

definition of help-seeking. In our intervention, help-seeking also included seeking help from non-professional sources (e.g., friends and family). Moreover, we wanted to motivate participants to seek help not only for mental health problems but also for other hassles of daily living (e.g., financial) that unresolved might facilitate the development of mental health problems.

The alcohol module contained feedback on 1) motivation to change drinking behavior, 2) current drinking behavior, 3) personal risk of experiencing (health related, psychological, social) negative consequences of consuming alcohol, 4) experienced pros and cons of consuming alcohol (alcohol related decisional balance), 5) processes of change, and 6) self-efficacy to resist drinking alcohol in highly tempting situations. The depression module contained feedback on 1) experienced depressive symptoms, 2) participants' motivation to use each DPB, 3) outcome expectations concerning DPBs, 4) processes of change, and 5) participants' self-efficacy to use DPBs. Outcome expectations were chosen over perceived pros and cons of using DPBs because it allows giving strategy specific feedback with less time consuming assessments. Participants preparing to reduce their alcohol intake or to adopt a DPB further received tips on how to plan the behavior change.

The final intervention system used in the pre-post pilot study contained 2902 text modules (baseline: n=727, T1: n=1095; T2: n=1080) which were combined by applying predefined rules, thus allowing for the creation of highly individualized feedback letters. After baseline, T1, and T2, participants received two letters, respectively (Supplementary Figure 1). The interval between letters was 7 days. Feedback was split to avoid that participants had to read and process too much information at once. Letters were divided into two parts. Part 1 focused on depression and DPBs, part 2 on alcohol consumption. Both modules were linked by information about the interrelation of depression and alcohol consumption. Supplementary Table 3 provides an overview on the different sections of the letters and the variables they were tailored by. Letters contained written and visual feedback elements (cf. attached example letters). Their length ranged from three to five pages. Beside the letters, participants received weekly individually tailored short messages via mobile phone or e-mail. These included one welcoming and one farewell message, 15 messages on DPBs (three for

each DPB), and nine messages on processes of change (six alcohol-related, three depression-related). The pool of short messages contained 872 messages. Letters and short messages contained several normative feedback elements. At T1 and T2, they also provided feedback on whether and what individual changes have occurred.



## Participant A: Letter 1

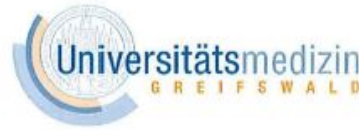

Institut für Sozialmedizin und Prävention, Walther-Rathenau-Str. 48, 17475 Greifswald

Institut für Sozialmedizin und Prävention  
Direktor: Prof. Dr. U. John

Ihr Ansprechpartner:

Walther-Rathenau-Str. 48  
17475 Greifswald  
Telefon:  
Telefax:  
E-Mail:

Datum: 00. XXXXX 0000

Herr  
John Doe  
XXXXXXXXXXXX  
00000 XXXXXXXXXX

### Ihre persönliche Rückmeldung zur Studie "Gesünder Leben"

Sehr geehrter Herr Doe,

vielen Dank für Ihre Teilnahme an der Befragung in Ihrer Hausarztpraxis und dem telefonischen Gespräch. Wie versprochen erhalten Sie heute eine Rückmeldung zu Ihren persönlichen Angaben.

#### Das seelische Wohlbefinden fördern - auch für Sie ein Thema

Zum Zeitpunkt unserer Befragung in der Arztpraxis ließ sich keine Beeinträchtigung Ihres seelischen Wohlbefindens feststellen. Darüber freuen wir uns! Innerhalb des letzten Jahres gab es jedoch eine Phase, in der Sie die Symptome einer Depression erlebt haben. Die von Ihnen berichtete Symptomatik entspricht dem Schweregrad einer mittelschweren depressiven Erkrankung. Hier wäre es wichtig Unterstützung durch einen Arzt oder Psychologen zu erhalten. In jedem Fall zeigt Ihnen diese Erfahrung, dass es für Sie wichtig ist langfristig etwas für Ihr seelisches Gleichgewicht zu tun.

#### Seelisch im Gleichgewicht bleiben

Das seelische Wohlbefinden ist ein ganz wesentlicher Teil unserer Gesundheit. Stress und anhaltende Belastungen können es allerdings aus dem Gleichgewicht bringen. Viele Menschen erleben dann Phasen von Niedergeschlagenheit, Traurigkeit, Lustlosigkeit und Erschöpfung. Dies können erste Anzeichen einer depressiven Erkrankung sein. Forschungsergebnisse belegen, dass wir aktiv dazu beitragen können, diese Phasen zu verkürzen oder sie ganz zu vermeiden. Dabei haben sich die folgenden fünf Strategien als geeignet herausgestellt:

1. Negativen Gedanken etwas Positives entgegensetzen - Beugen Sie negativen Gedanken vor oder unterbrechen Sie Grübeln gezielt, indem Sie sich z.B. die eigenen Stärken oder angenehme Erlebnisse bewusst machen.
2. An den meisten Tagen der Woche sportlich aktiv sein - Regelmäßige Bewegung stärkt nicht nur Ihren Körper, sondern hilft auch, seelisch im Gleichgewicht zu bleiben.
3. Regelmäßig etwas tun, um mit Stress besser umzugehen - Teilen Sie sich Ihre Zeit gut ein und planen Sie Ihre Tage. Auch regelmäßige Entspannungsübungen helfen Ihnen, mit Stress umzugehen.

4. Ausübung angenehmer Aktivitäten an den meisten Tagen der Woche - Tun Sie Dinge, die Ihnen wichtig sind, Ihnen gut tun oder aus denen Sie Kraft schöpfen. Bleiben Sie auch dann aktiv, wenn die Stimmung mal am Boden ist. Jede Aktivität ist ein wichtiger Schritt.

5. Sich Hilfe suchen, wenn Probleme Sie belasten - Freunde und Familie können eine erste Anlaufstelle bei Alltagsproblemen sein. Oft ist auch ein Gespräch mit Fachleuten, wie z.B. Ihrem Hausarzt, oder das Aufsuchen einer Beratungsstelle hilfreich.

#### Wo stehen Sie?

Die Abbildung zeigt Ihre Motivation zur Ausübung der Strategien. Sie tun bereits einiges für Ihr seelisches Wohlbefinden, indem Sie 2 der genannten Strategien in Ihrem Alltag nutzen. Darauf können Sie stolz sein! Dies wird Ihnen helfen langfristig im seelischen Gleichgewicht zu bleiben.

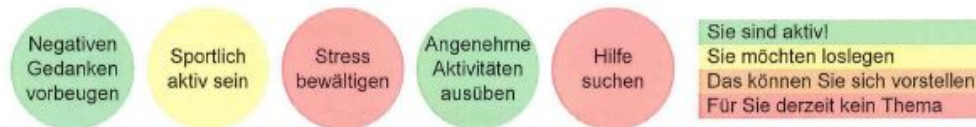

#### Was Sie zum Thema Depressionen wissen sollten

Viele Menschen haben die gleichen Erfahrungen wie Sie gemacht. Etwa 8% der Männer im Alter von 18-29 Jahren erleben behandlungsbedürftige depressive Symptome. Trotz derzeitiger Symptomfreiheit sollten Sie solche Episoden nicht auf die leichte Schulter nehmen. Dass Sie bereits Strategien zur Förderung des seelischen Wohlbefindens in Ihrem Alltag anwenden, hilft Ihnen, einem erneuten Auftreten solcher oder gar schlimmerer Phasen entgegenzuwirken. Gleichzeitig beugen Sie auch weiteren Erkrankungen vor. So senken Sie beispielsweise Ihr Risiko für die sogenannte Zuckerkrankheit (Diabetes), für Herz-Kreislauf-Erkrankungen und für die Entwicklung geistiger Beeinträchtigungen im höheren Lebensalter.

Die Deutsche Depressionshilfe bietet auf Ihren Internetseiten ([www.deutsche-depressionshilfe.de](http://www.deutsche-depressionshilfe.de)) ausführlichere Informationen zu Symptomen, Ursachen und Behandlungsmöglichkeiten depressiver Erkrankungen. Wenn Sie möchten, schauen Sie sich diese doch einmal an.

#### Die Alkoholfalle bei Depressionen

Wenn man sich nicht besonders gut fühlt, besteht die Gefahr, dass Alkohol gezielt als "Seelenröster" eingesetzt wird. Zwar mag Alkohol kurzfristig Erleichterung verschaffen, auf lange Sicht werden Probleme und Stimmungstiefs aber noch verstärkt. Aufgrund der wechselseitigen Beeinflussung von Depression und Alkohol möchten wir Ihnen hier ebenfalls eine Rückmeldung zu Ihrem Alkoholkonsum geben.

Wenn Sie ausführlichere Informationen zum Zusammenspiel von Alkohol und Depressionen wünschen, empfehlen wir Ihnen folgende Internetseite der Aktion „Alkohol? Kenn dein Limit.“: <http://www.kenn-dein-limit.info/news/artikel/alkohol-retter-in-der-not.html>

#### Wo stehen Sie?

Sie denken hin und wieder über Ihren Alkoholkonsum nach. Aber derzeit sind Sie noch nicht überzeugt, dass Sie daran etwas ändern möchten. Wir möchten Ihnen hiermit einige Anregungen und Informationen geben.

### Was ist risikoarmer Alkoholkonsum?

Die meisten Menschen müssen nicht komplett auf Alkohol verzichten, um sich gesundheitsbewusst zu verhalten. Die Grenzen risikoarmen Alkoholkonsums sind jedoch kaum bekannt:

Gesunde Männer sollten:

- insgesamt höchstens 14 kleine Getränke in der Woche
- und dabei höchstens 4 kleine Getränke zu einer Gelegenheit trinken.

Wenn Männer 3 mal in der Woche Alkohol trinken, sollten sie dennoch höchstens 4 kleine Getränke zu einer Gelegenheit trinken. Wenn Sie mit Alkohol unvereinbare Medikamente nehmen oder wenn Ihnen ein Arzt vom Alkoholkonsum abgeraten hat, dann sollten Sie gänzlich darauf verzichten.

Ein kleines  
Getränk  
beinhaltet:

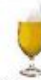

0,25 – 0,3 l  
Bier

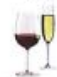

0,1 – 0,15 l  
Wein/Sekt

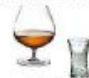

4 cl  
Spirituosen

### Ihre Trinkmenge im Vergleich

Wenn Sie wissen möchten, wie viel Sie im Vergleich zu anderen Männern trinken, können Sie dies der Abbildung entnehmen. Ihr Alkoholkonsum pro Woche liegt innerhalb des dunklen Tortenstücks.

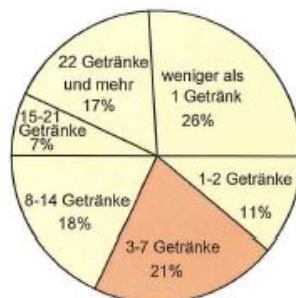

Sie trinken 3 bis 7 Getränke pro Woche wie 21% der Männer zwischen 18 und 65 Jahren

### Hohe Trinkmenge zu einer Gelegenheit

Sie trinken nicht mehr als 14 kleine alkoholische Getränke pro Woche. Das ist gut so. **Aber:** Des Öfteren trinken Sie mehr als 4 kleine alkoholische Getränke zu einer Gelegenheit. Damit haben Sie ein erhöhtes Risiko für negative Folgen des Alkoholkonsums. Sie können Ihr Risiko senken, indem Sie zukünftig höchstens 4 kleine Getränke zu einer Gelegenheit trinken.

### **Für Sie überwiegen die unangenehmen Seiten des Alkoholtrinkens**

Das finden Sie gut am Alkoholtrinken: Es hilft Ihnen sich bei einem geselligen Beisammensein nicht ausgeschlossen zu fühlen und zu entspannen.

Gut ist, dass Sie die folgenden Nachteile riskanten Alkoholkonsums in Ihre Entscheidung, Alkohol zu trinken oder nicht zu trinken, einfließen lassen:

- Sie sind ein schlechtes Beispiel für andere.
- Sie nehmen an Körpergewicht zu.
- Sie schaden Ihrer Gesundheit.

### **Im Vergleich zu anderen Menschen ...**

... erscheinen Ihnen die unangenehmen Seiten als bedeutsam. Diese kritische Sichtweise ist wirklich lobenswert!

### **Bleiben Sie am Ball**

Auf dem Weg zur langfristigen Stabilisierung Ihres seelischen Wohlbefindens sind Sie weit fortgeschritten. Sie haben es geschafft, seit einiger Zeit Strategien zur Förderung des seelischen Wohlbefindens in Ihren Alltag zu integrieren. Das ist ein sehr schöner Erfolg und wir gratulieren Ihnen herzlich. Auf dem Weg risikoarm zu trinken, haben Sie bereits eine entscheidende Hürde genommen: Sie denken darüber nach, weniger zu trinken.

Wir hoffen, Ihnen hilfreiche Informationen gegeben zu haben, die Sie für Ihr Wohlbefinden und Ihre Gesundheit nutzen können. In den kommenden Tagen werden wir Ihnen einen weiteren Brief zukommen lassen, mit Empfehlungen, die Sie bei Ihren Vorhaben unterstützen sollen.

Bis dahin wünschen wir Ihnen, sehr geehrter Herr Doe, alles Gute!

Mit freundlichen Grüßen  
Ihr Gesünder Leben Team



Prof. Dr. C. Meyer



Dipl.-Psych. K. Krause



Dipl.-Psych. D. Gürtler



## Participant A: Letter 2

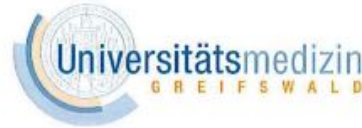

Institut für Sozialmedizin und Prävention, Walther-Rathenau-Str. 48, 17475 Greifswald

Institut für Sozialmedizin und Prävention  
Direktor: Prof. Dr. U. John

Ihr Ansprechpartner:

Walther-Rathenau-Str. 48  
17475 Greifswald  
Telefon:  
Telefax:  
E-Mail:

Datum: 00. XXXXX 0000

Herr  
John Doe  
XXXXXXXXXXXX  
00000 XXXXXXXXXX

### Ihre persönliche Rückmeldung zur Studie "Gesünder Leben"

Sehr geehrter Herr Doe,

hiermit erhalten Sie den zweiten Teil Ihrer Rückmeldung zu Ihren Angaben im Gespräch.

Im letzten Brief haben wir Ihnen Strategien zur Förderung des seelischen Wohlbefindens vorgestellt. Die Abbildung zeigt noch einmal Ihre Motivation zur Ausübung der Strategien. Sie tun bereits einiges für Ihr seelisches Wohlbefinden, indem Sie 2 der genannten Strategien in Ihrem Alltag nutzen.

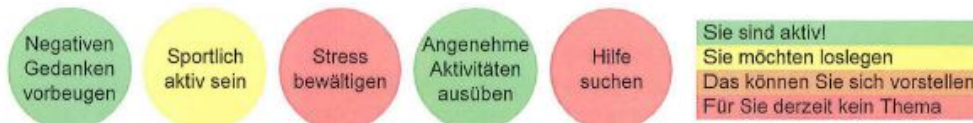

### Was treibt Sie an?

Die Verbesserung Ihres seelischen Wohlbefindens kann ein entscheidender Antrieb bei der Veränderung Ihrer Gewohnheiten sein. Insgesamt können Sie sich vorstellen, dass sich die Strategien, die Sie bereits anwenden, positiv auf Ihr seelisches Wohlbefinden auswirken. Dies wird Ihnen helfen am Ball zu bleiben. Die Abbildung zeigt Ihnen, inwieweit Sie Verbesserungen Ihres seelischen Wohlbefindens durch die Anwendung jeder einzelnen Strategie erwarten.

Zur Zeit halten Sie positive Auswirkungen der Strategien auf Ihr seelisches Wohlbefinden für ...

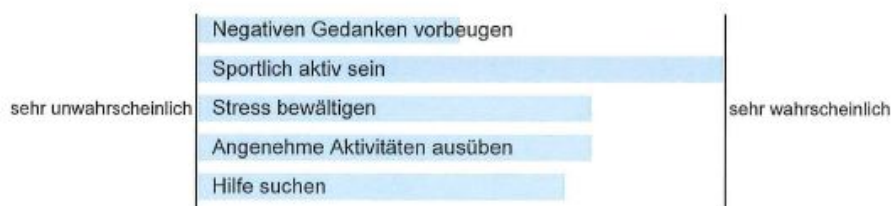

Wie Sie sehen, sind die Strategien, die Sie bereits anwenden, nicht die einzigen, denen Sie einen positiven Einfluss auf Ihr seelisches Wohlbefinden zutrauen. Dies mag ein Argument dafür sein, auch bei anderen Strategien einen nächsten Schritt zu wagen.

Es kann hilfreich sein sich zu überlegen, welche weiteren Vorteile die von Ihnen angewandten Strategien zur Förderung des seelischen Wohlbefindens mit sich bringen könnten. Vielleicht fallen Ihnen Punkte ein, an die Sie bisher noch gar nicht gedacht haben, die Ihnen jedoch wichtig sind. Versuchen Sie dies auch für die Strategien, die Sie noch nicht anwenden.

#### **Sie fördern bereits Ihr seelisches Wohlbefinden – Wie kommen Sie weiter?**

Es gibt eine ganze Reihe von Tricks und Techniken, die Sie bei der langfristigen Förderung Ihres seelischen Wohlbefindens unterstützen können. Bei vielen Menschen haben sich die folgenden Empfehlungen bewährt. Sind auch für Sie geeignete Anregungen dabei?

##### **▣ Nutzen Sie Erinnerungshilfen, meiden Sie schwierige Situationen**

Manchen Menschen hilft es, sich Erinnerungen an ihre Vorhaben, z.B. in ihrer Wohnung, zu platzieren und Menschen und Situationen, die sie davon abhalten können, zu meiden. Was könnte Sie erfolgreich an Ihre Vorhaben erinnern? In welchen Situationen könnte Ihnen die Förderung des seelischen Wohlbefindens schwer fallen?

##### **▣ Seien Sie stolz auf sich**

In der heutigen, oft stressigen Zeit ist es nicht selbstverständlich, sich regelmäßig Zeit zur Förderung seines seelischen Wohlbefindens zu nehmen. Es macht Sie stolz, wenn Sie es dennoch schaffen. Denken Sie an dieses Gefühl, wenn es Ihnen einmal schwerer fällt, sich aufzuraffen.

##### **▣ Halten Sie an Ihrem Entschluss fest**

Ihnen ist bewusst, dass Sie Ihr seelisches Wohlbefinden verbessern können, wenn Sie es wollen. Das ist sehr hilfreich, um Ihre Pläne dauerhaft erfolgreich umzusetzen.

#### **Sie sind zuversichtlich, es zu schaffen**

Insgesamt sind Sie zuversichtlich, die Strategien, die Sie bereits anwenden, weiterhin erfolgreich umsetzen zu können. Das ist eine gute Voraussetzung, um in Ihren Bemühungen auch zukünftig erfolgreich zu sein. Ihre Zuversicht zur Ausübung jeder einzelnen Strategie können Sie der Abbildung entnehmen. Wie Sie sehen, sind die Strategien, die Sie bereits anwenden, nicht die einzigen, deren erfolgreiche Umsetzung Sie sich zutrauen. Dies mag ein Argument dafür sein, weitere Schritte zur Förderung des seelischen Wohlbefindens zu unternehmen. Entscheiden Sie selbst, wie viel Sie leisten können.

##### **Ihre derzeitige Zuversicht, die Strategien (weiterhin) ausüben zu können ist ...**

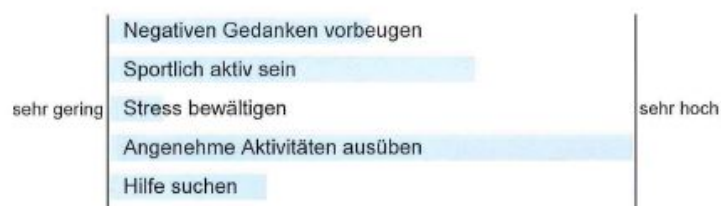

#### **Werden Sie sich Ihrer Stärken bewusst.**

Eine Verhaltensänderung ist immer eine Herausforderung. Wie haben Sie bisherige Herausforderungen gemeistert? Welche Eigenschaften, welche Stärken haben Ihnen geholfen? Inwieweit könnten diese auch jetzt behilflich sein?

Sie haben nun viele Informationen erhalten, die Sie zur Förderung Ihres seelischen Wohlbefindens nutzen können. Im zweiten Teil unseres Briefes möchten wir den Schwerpunkt nun wieder auf den gesundheitsverträglichen Umgang mit Alkohol lenken.

**Sie denken darüber nach weniger Alkohol zu konsumieren – Wie kommen Sie weiter?**

Die folgenden Empfehlungen haben sich in vielen Fällen bewährt und können Sie bei dem Ziel, risikoarm zu trinken, unterstützen. Ob auch für Sie geeignete Anregungen dabei sind, entscheiden Sie allein.

**■ Seien Sie offen für Informationen**

Verglichen mit anderen nehmen Sie Informationen über negative Auswirkungen des Alkoholtrinkens eher wenig wahr. Viele Menschen meiden bewusst Informationen zu den Gesundheitsrisiken des Alkoholkonsums. Es könnte hilfreich sein, diesen Dingen mehr Aufmerksamkeit zu schenken.

**■ Besinnen Sie sich auf Ihre Prinzipien**

An einigen Punkten stimmt für Sie das Alkoholtrinken nicht mit Ihren Prinzipien überein. Das mag ein Argument sein, weiter über Vorteile einer möglichen Änderung nachzudenken.

**Achtung: Kritische Situationen!**

Jeder trinkt in ganz bestimmten Situationen besonders gern ein alkoholisches Getränk. Diese machen es einem schwer, seine Trinkgewohnheiten zu ändern. Es ist daher wichtig, sich vorher zu überlegen, wie man in solchen Situationen angemessen reagieren kann.

Sie haben vergleichsweise wenig Zutrauen in Ihre Fertigkeiten, auch in kritischen Situationen bei Ihren Zielen zu bleiben. Dies ist für Sie vielleicht ein großes Hindernis, konkrete Veränderungen zu planen. Überlegen Sie einmal: Was sind das für Situationen und wie können Sie mit diesen besser umgehen? Welche Alternativen zum Alkoholtrinken könnte es dabei für Sie geben?

Ihnen fällt es besonders in guter Stimmung und in sozialen Situationen schwer, wenig bzw. keinen Alkohol zu trinken. Folgendes kann hilfreich sein:

- Meiden Sie zunächst Situationen, in denen viel Alkohol getrunken wird.
- Überlegen Sie sich vorher, wie viel Gläser Alkohol Sie maximal trinken möchten.
- Weisen Sie Angebote, Alkohol zu trinken, deutlich zurück.

**Bleiben Sie am Ball!**

Wir hoffen, Ihnen auch mit diesem Brief wertvolle Informationen gegeben zu haben, die Sie für Ihr Wohlbefinden und Ihre Gesundheit nutzen können. Wir werden Sie weiterhin durch unsere wöchentliche SMS-Nachricht begleiten. In etwa 6 Wochen möchten wir Sie zu unserer zweiten telefonischen Befragung einladen. Bleiben Sie neugierig!

Wir wünschen Ihnen, sehr geehrter Herr Doe, alles Gute und viel Erfolg!

Mit freundlichen Grüßen  
Ihr Gesünder Leben Team



Prof. Dr. C. Meyer



Dipl.-Psych. K. Krause



Dipl.-Psych. D. Gürtler



## Participant A: Letter 3

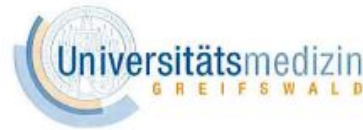

Institut für Sozialmedizin und Prävention, Walther-Rathenau-Str. 48, 17475 Greifswald

Institut für Sozialmedizin und Prävention  
Direktor: Prof. Dr. U. John

Ihr Ansprechpartner:

Walther-Rathenau-Str. 48  
17475 Greifswald  
Telefon:  
Telefax:  
E-Mail:

Datum: 00. XXXXX 0000

Herr  
John Doe  
XXXXXXXXXXXX  
00000 XXXXXXXXXX

### Ihre neue Rückmeldung zur Studie "Gesünder Leben"

Sehr geehrter Herr Doe,

vielen Dank, dass Sie an unserer zweiten telefonischen Befragung teilgenommen haben. Sie erhalten nun eine neue persönliche Rückmeldung, in der wir Ihnen Veränderungen seit der ersten Befragung mitteilen.

#### Das seelische Wohlbefinden fördern - auch für Sie ein Thema

Innerhalb der letzten zwei Monate gab es eine Phase, in der Sie die Symptome einer Depression erlebt haben. Die von Ihnen berichtete Symptomatik entspricht dem Schweregrad einer milden depressiven Erkrankung. Im Vergleich zur vorausgegangenen Episode stellt dies eine schwächere Symptomatik dar. Diese Erfahrung zeigt Ihnen jedoch erneut, dass es für Sie wichtig ist, langfristig etwas für Ihr seelisches Gleichgewicht zu tun.

#### Seelisch im Gleichgewicht bleiben

Erinnern Sie sich noch an die fünf Strategien zur Förderung Ihres seelischen Wohlbefindens, die wir Ihnen vorgestellt haben? Diese waren:

1. Negativen Gedanken etwas Positives entgegensetzen
2. An den meisten Tagen der Woche sportlich aktiv sein
3. Regelmäßig etwas tun, um mit Stress besser umzugehen
4. Ausüben angenehmer Aktivitäten an den meisten Tagen der Woche
5. Sich Hilfe suchen, wenn Probleme Sie belasten

#### Wo stehen Sie?

Sie fördern weiterhin aktiv Ihr seelisches Wohlbefinden, indem Sie sich an den meisten Tagen der Woche Zeit für angenehme Aktivitäten nehmen. Weiter so! Die Abbildung zeigt für jede Strategie Ihre aktuelle Motivation, diese anzuwenden. Vielleicht können Sie diese neue Rückmeldung nutzen, um auch frühere Überlegungen noch einmal aufzufrischen und alte Vorhaben wieder aufzunehmen.

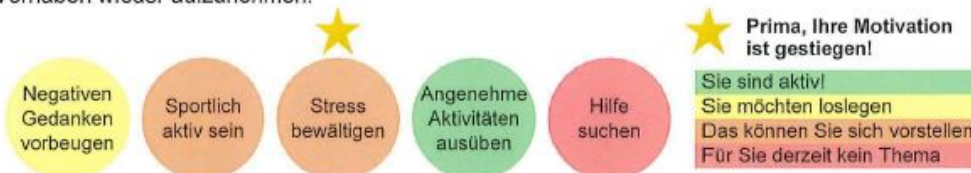



### Den Verlauf beeinflussen

Bei vielen Menschen kommt es wiederholt zu Phasen, in denen Sie depressive Symptome erleben. Diese Erfahrung haben auch Sie gemacht. Dies zeigt Ihnen, wie wichtig es ist, auch in Zeiten, in denen Sie sich wohl und ausgeglichen fühlen, etwas für Ihr seelisches Wohlbefinden zu tun. Wie sich eine erneute Symptomatik äußert, lässt sich nicht vorhersagen. Erneute schwere Verläufe lassen sich jedoch nicht ausschließen. Indem Sie bereits Strategien zur Förderung Ihres seelischen Wohlbefindens in Ihrem Alltag anwenden, tragen Sie entscheidend dazu bei, Ihr Risiko für das erneute Auftreten depressiver Symptome zu reduzieren.

Lassen Sie sich nicht entmutigen, wenn ihre Bemühungen noch nicht zu den gewünschten Erfolgen führen. Mitunter braucht es Zeit, bis die Strategien ihre Wirkung entfalten. Manchmal kann es hilfreich sein, weitere Strategien in den Alltag zu integrieren. Nur Sie allein können entscheiden, wie viel Sie leisten können und wovon Sie profitieren.

Sie haben nun viele Informationen rund um Ihr seelisches Wohlbefinden und dessen Förderung erhalten. Im zweiten Teil unseres Briefes möchten wir uns nun wieder dem gesundheitsverträglichen Umgang mit Alkohol widmen.

### Wo stehen Sie?

Sie machen sich nach wie vor Gedanken über den Alkoholkonsum. Gleichzeitig sind Sie nicht ausreichend überzeugt, dass Sie daran etwas ändern möchten. Wir möchten Ihnen hiermit einige Anregungen und Informationen geben.

### Erinnern Sie sich an die Grenzen risikoarmen Alkoholkonsums?

Gesunde Männer sollten:

- insgesamt höchstens 14 kleine Getränke in der Woche
- und dabei höchstens 4 kleine Getränke zu einer Gelegenheit trinken.

Wenn Männer (fast) jeden Tag Alkohol trinken, sollten sie höchstens 2 kleine Getränke am Tag trinken. Wenn Sie mit Alkohol unvereinbare Medikamente nehmen oder wenn Ihnen ein Arzt vom Alkoholkonsum abgeraten hat, dann sollten Sie gänzlich darauf verzichten.

Ein kleines  
Getränk  
beinhaltet:

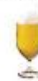

0,25 – 0,3 l Bier

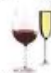

0,1 – 0,15 l  
Wein/Sekt

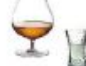

4 cl Spirituosen

### Ihre Trinkmenge im Vergleich

Wenn Sie wissen möchten, wie viel Sie nun im Vergleich zu anderen Männern trinken, können Sie dies der Abbildung entnehmen. Ihr Alkoholkonsum pro Woche liegt innerhalb des dunklen Tortenstücks.

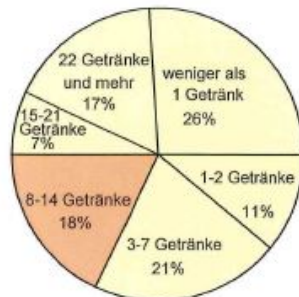

Sie trinken 8 bis 14 Getränke pro Woche wie 18% der Männer zwischen 18 und 65 Jahren

Verglichen mit Ihren Angaben der ersten Befragung haben Sie die Anzahl alkoholischer Getränke pro Woche fast verdreifacht.

### Hohe Trinkmenge zu einer Gelegenheit

Sie trinken nicht mehr als 14 kleine alkoholische Getränke pro Woche. Das ist gut so. **Aber:** Des Öfteren trinken Sie mehr als 4 kleine alkoholische Getränke zu einer Gelegenheit. Damit haben Sie ein erhöhtes Risiko für negative Folgen des Alkoholkonsums. Sie können Ihr Risiko senken, indem Sie zukünftig höchstens 4 kleine Getränke zu einer Gelegenheit trinken.

### Für Sie überwiegen nach wie vor die unangenehmen Seiten des Alkoholtrinkens.

Das finden Sie gut am Alkoholtrinken: Es hilft Ihnen sich bei einem geselligen Beisammensein nicht ausgeschlossen zu fühlen und zu entspannen.

Gut ist, dass Sie die folgenden Nachteile riskanten Alkoholkonsums in Ihre Entscheidung, Alkohol zu trinken oder nicht zu trinken, einfließen lassen:

- Sie nehmen an Körpergewicht zu.
- Sie schaden Ihrer Gesundheit.
- Sie sind körperlich weniger leistungsfähig.

### Im Vergleich zu anderen Menschen ...

... erscheinen Ihnen die unangenehmen Seiten als bedeutsamer. Diese kritische Sichtweise ist wirklich lobenswert!

### Bleiben Sie am Ball

Auf dem Weg zur langfristigen Stabilisierung Ihres seelischen Wohlbefindens sind Sie weit fortgeschritten. Sie haben es geschafft, seit einiger Zeit Strategien zur Förderung des seelischen Wohlbefindens in Ihren Alltag zu integrieren. Das ist ein sehr schöner Erfolg und wir gratulieren Ihnen herzlich.

Auf dem Weg risikoarm zu trinken, haben Sie bereits eine entscheidende Hürde genommen: Sie denken darüber nach, die Grenzen risikoarmen Konsums einzuhalten.

Wir hoffen, Ihnen hilfreiche Informationen gegeben zu haben, die Sie für Ihr Wohlbefinden und Ihre Gesundheit nutzen können. In den kommenden Tagen werden wir Ihnen einen weiteren Brief zukommen lassen, mit Empfehlungen, die Sie bei Ihren Vorhaben unterstützen sollen.

Bis dahin wünschen wir Ihnen, sehr geehrter Herr Doe, alles Gute!

Mit freundlichen Grüßen  
Ihr Gesünder Leben Team



Prof. Dr. C. Meyer



Dipl.-Psych. K. Krause



Dipl.-Psych. D. Gürtler

## Participant A: Letter 4

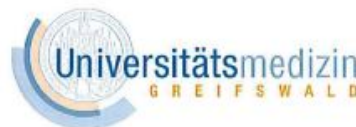

Institut für Sozialmedizin und Prävention, Walther-Rathenau-Str. 48, 17475 Greifswald

Institut für Sozialmedizin und Prävention  
Direktor: Prof. Dr. U. John

Ihr Ansprechpartner:

Walther-Rathenau-Str. 48  
17475 Greifswald  
Telefon:  
Telefax:  
E-Mail:

Datum: 00. XXXXX 0000

Herr  
John Doe  
XXXXXXXXXXXX  
00000 XXXXXXXXXX

### Ihre neue Rückmeldung zur Studie "Gesünder Leben"

Sehr geehrter Herr Doe,

hiermit erhalten Sie den zweiten Teil Ihrer persönlichen Rückmeldung zu Ihren Angaben aus der zweiten telefonischen Befragung.

Die Abbildung zeigt noch einmal Ihre Motivation zur Anwendung der Strategien. Sie tun bereits aktiv etwas für Ihr seelisches Wohlbefinden, indem Sie sich an den meisten Tagen der Woche Zeit für angenehme Aktivitäten nehmen.

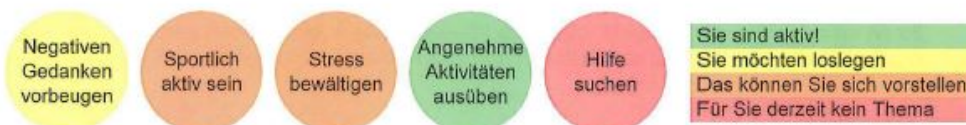

### Was treibt Sie an?

Die Verbesserung Ihres seelischen Wohlbefindens kann ein entscheidender Antrieb bei der Veränderung Ihrer Gewohnheiten sein. Mittlerweile sind Sie insgesamt überzeugt, dass sich die fünf Strategien positiv auf Ihr seelisches Wohlbefinden auswirken. Dass sich die Strategie, die Sie bereits anwenden, positiv auf dieses auswirkt, können Sie sich ebenfalls vorstellen. Dies wird Ihnen helfen am Ball zu bleiben.

Die Abbildung zeigt Ihnen für jede Strategie, inwieweit Sie Verbesserungen Ihres seelischen Wohlbefindens durch deren Anwendung erwarten. Wie Sie sehen, trauen Sie positive Einflüsse nicht nur der Strategie zu, die Sie bereits anwenden. Vielleicht ein Argument dafür, auch bei anderen Strategien einen nächsten Schritt zu wagen.

Zurzeit halten Sie positive Auswirkungen der Strategien auf Ihr seelisches Wohlbefinden für ...

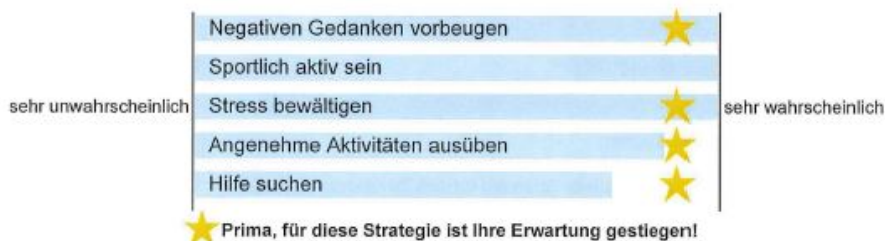



Es kann nützlich sein sich zu überlegen, welche weiteren Vorteile die Strategien zur Förderung des seelischen Wohlbefindens für Sie persönlich bereithalten könnten. Vielleicht fallen Ihnen Punkte ein, an die Sie bisher noch gar nicht gedacht haben, die Ihnen jedoch wichtig sind. Dies kann Ihnen helfen, Ihre Einstellungen zu überdenken und Sie in Ihren Absichten bestärken.

#### **Sie fördern bereits Ihr seelisches Wohlbefinden – Wie kommen Sie weiter?**

Es gibt eine ganze Reihe von Tricks und Techniken, die Sie bei der langfristigen Förderung Ihres seelischen Wohlbefindens unterstützen können. Bei vielen Menschen haben sich die folgenden Empfehlungen bewährt. Sind auch für Sie geeignete Anregungen dabei?

##### **▣ Lassen Sie sich unterstützen**

Inzwischen lassen Sie sich seltener durch Freunde und Familie bei Ihren Vorhaben unterstützen als noch vor ein paar Wochen. Wem aus Ihrem Umfeld würden Sie zutrauen, Sie bei der Förderung Ihres seelischen Wohlbefindens zu unterstützen? Vielleicht haben Sie ja schon jemanden vor Augen. Sprechen Sie diese Person gezielt an und treffen Sie gemeinsame Entscheidungen darüber, wie die Unterstützung aussehen könnte.

##### **▣ Seien Sie stolz auf sich**

Gerade in der heutigen, oft stressigen Zeit ist es nicht selbstverständlich, sich regelmäßig Zeit zur Förderung seines seelischen Wohlbefindens zu nehmen. Inzwischen wissen Sie Ihre eigenen Leistungen mehr zu schätzen als noch vor einigen Wochen. Sie sind zu Recht stolz auf sich, wenn Sie es schaffen, sich die Zeit zur Förderung Ihres seelischen Wohlbefindens zu nehmen. Erinnern Sie sich an dieses gute Gefühl, wenn es Ihnen mal schwerer fällt, sich aufzuraffen.

##### **▣ Halten Sie an Ihrem Entschluss fest**

Ihnen ist nach wie vor bewusst, dass Sie Ihr seelisches Wohlbefinden verbessern können, wenn Sie es wollen. Das ist sehr hilfreich, um Ihre Pläne dauerhaft erfolgreich umzusetzen.

#### **Ihre Zuversicht**

Untersuchungen belegen einen Zusammenhang zwischen der erfolgreichen Änderung von Gewohnheiten und unserer Zuversicht, dies zu schaffen. Insgesamt sind Sie weiterhin zuversichtlich, die Strategien zur Förderung des seelischen Wohlbefindens erfolgreich umsetzen zu können. Die weitere erfolgreiche Umsetzung der Strategie, die Sie bereits anwenden, trauen Sie sich ebenfalls zu. Das ist eine gute Voraussetzung, um in Ihren Bemühungen auch zukünftig erfolgreich zu sein. Ihre Zuversicht zur Ausübung jeder einzelnen Strategie können Sie der Abbildung entnehmen. Wie Sie sehen, ist die Strategie, die Sie bereits anwenden, nicht die einzige, deren erfolgreiche Umsetzung Sie sich zutrauen. Dies mag ein Argument dafür sein, weitere Schritte zur Förderung des seelischen Wohlbefindens zu unternehmen. Entscheiden Sie selbst, wie viel Sie leisten können.

#### **Ihre derzeitige Zuversicht, die Strategien (weiterhin) ausüben zu können ist ...**

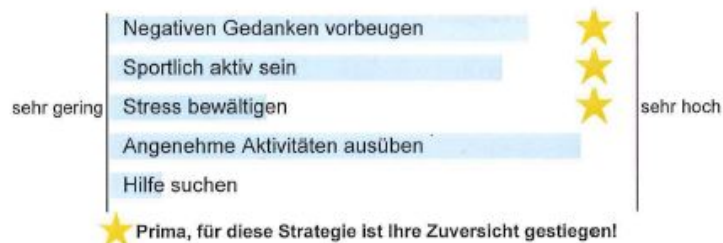

**Werden Sie sich Ihrer Stärken weiterhin bewusst.**

Eine gänzlich fehlende Zuversicht zur erfolgreichen Umsetzung äußern Sie für keine der fünf Strategien. Was genau hat Sie bewogen, Ihre Zuversicht nicht geringer einzuschätzen? Die Antwort auf diese Frage führt Sie zu Ihren Stärken. Wenn Sie möchten, versuchen Sie doch einmal, sie für alle fünf Strategien zu beantworten.

Sie haben nun viele Informationen erhalten, die Sie zur Förderung Ihres seelischen Wohlbefindens nutzen können. Im zweiten Teil unseres Briefes möchten wir den Schwerpunkt nun wieder auf den gesundheitsvertraglichen Umgang mit Alkohol lenken.

**Sie denken darüber nach weniger Alkohol zu konsumieren – Wie kommen Sie weiter?**

Die folgenden Empfehlungen haben sich in vielen Fällen bewährt und können Sie bei dem Ziel, risikoarm zu trinken, unterstützen. Ob auch für Sie geeignete Anregungen dabei sind, entscheiden Sie allein.

**▣ Überdenken Sie die Folgen.**

Sie sind nach wie vor häufiger betroffen, wenn Sie von negativen Folgen des Alkoholtrinkens hören. Dies hilft Ihnen, Vor- und Nachteile des risikoarmen Konsums einordnen zu können.

**▣ Seien Sie offen für Informationen.**

Verglichen mit anderen nehmen Sie Informationen zu den negativen Auswirkungen des Alkoholtrinkens nach wie vor wenig wahr. Viele Menschen meiden bewusst Informationen zu den Gesundheitsrisiken. Achten Sie in der nächsten Zeit einmal auf solche Informationen, z. B. in den Medien.

**Achtung: Kritische Situationen!**

Jeder trinkt in ganz bestimmten Situationen besonders gern ein alkoholisches Getränk. Diese machen es einem schwer, seine Trinkgewohnheiten zu verändern. Es ist daher wichtig, sich vorher zu überlegen, wie man in solchen Situationen angemessen reagieren kann.

Sie haben ein vergleichsweise hohes Zutrauen in Ihre Fertigkeiten, auch in kritischen Situationen bei Ihren Zielen zu bleiben. Seit der ersten Befragung ist Ihre Zuversicht noch größer geworden. Das sind gute Voraussetzungen, falls Sie planen, etwas an Ihrem Alkoholkonsum zu ändern. Ihnen fällt es besonders in negativen Stimmungen schwer, wenig bzw. keinen Alkohol zu trinken. Folgendes kann hilfreich sein:

- Alternativen entwickeln,
- Musik hören, sich entspannen,
- Stressige Situationen meiden,
- Mit Freunden sprechen,
- Sich daran erinnern, dass Alkohol keine Probleme löst.

**Bleiben Sie am Ball!**

Wir hoffen, Ihnen auch mit diesem Brief wertvolle Informationen gegeben zu haben, die Sie für Ihr Wohlbefinden und Ihre Gesundheit nutzen können. Wir werden Sie weiterhin durch unsere wöchentliche SMS-Nachricht begleiten. In etwa 6 Wochen möchten wir Sie dann zu unserer dritten telefonischen Befragung einladen. Bleiben Sie neugierig!

Bis dahin wünschen wir Ihnen, sehr geehrter Herr Doe, alles Gute!

Mit freundlichen Grüßen  
Ihr Gesünder Leben Team



Prof. Dr. C. Meyer



Dipl.-Psych. K. Krause



Dipl.-Psych. D. Gürtler

## Participant A: Letter 5

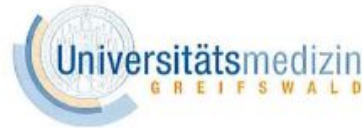

Institut für Sozialmedizin und Prävention, Walther-Rathenau-Str. 48, 17475 Greifswald

Institut für Sozialmedizin und Prävention  
Direktor: Prof. Dr. U. John

Ihr Ansprechpartner:

Walther-Rathenau-Str. 48  
17475 Greifswald  
Telefon:  
Telefax:  
E-Mail:

Datum: 00. XXXXX 0000

Herr  
John Doe  
XXXXXXXXXXXX  
00000 XXXXXXXXXX

### Ihre neue Rückmeldung zur Studie "Gesünder Leben"

Sehr geehrter Herr Doe,

vielen Dank, dass Sie an unserer dritten telefonischen Befragung teilgenommen haben. Sie erhalten nun eine neue persönliche Rückmeldung, in der wir Ihnen Veränderungen seit der letzten Befragung mitteilen.

#### Ihr seelisches Wohlbefinden

In den letzten 2 Monaten haben Sie keine Beeinträchtigungen Ihres seelischen Wohlbefindens erlebt. Bei unserer vorherigen Befragung haben Sie uns noch von einer Phase berichtet, in der Sie die Symptome einer Depression erlebt haben. Auch wenn es sich damals nicht um behandlungsbedürftige depressive Symptome handelte, freuen wir uns sehr für Sie, dass sich heute ein anderes Bild zeigt.

#### Seelisch im Gleichgewicht bleiben

Erinnern Sie sich noch an die fünf Strategien zur Förderung Ihres seelischen Wohlbefindens, die wir Ihnen vorgestellt haben? Diese waren:

1. Negativen Gedanken etwas Positives entgegensetzen
2. An den meisten Tagen der Woche sportlich aktiv sein
3. Regelmäßig etwas tun, um mit Stress besser umzugehen
4. Ausüben angenehmer Aktivitäten an den meisten Tagen der Woche
5. Sich Hilfe suchen, wenn Probleme Sie belasten

#### Wo stehen Sie?

Sie fördern weiterhin aktiv Ihr seelisches Wohlbefinden, indem Sie sich an den meisten Tagen der Woche Zeit für angenehme Aktivitäten nehmen. Darauf können Sie stolz sein. Die Abbildung zeigt Ihnen für jede Strategie Ihre aktuelle Motivation diese anzuwenden. Wie Sie sehen, sind Sie auf dem besten Weg zu einem gesundheitsbewussteren Leben. Machen Sie weiter so!

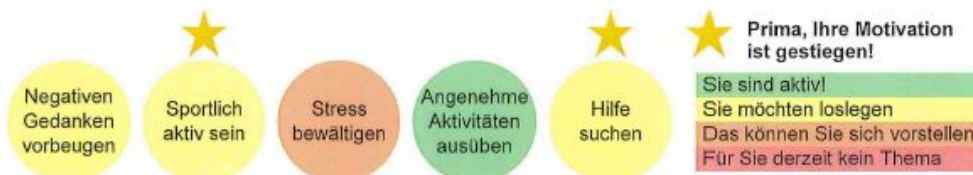



### Dem Wiederauftreten entgegenwirken

Depressive Erkrankungen verlaufen häufig in Phasen. Nicht selten kommt es nach vorübergehender Symptombefreiheit zum erneuten Auftreten depressiver Symptome. Deshalb ist es wichtig, das seelische Wohlbefinden auch in Zeiten, in denen man sich wohl und ausgeglichen fühlt, nicht zu vernachlässigen. Indem Sie bereits Strategien zur Förderung Ihres seelischen Wohlbefindens in Ihrem Alltag anwenden, tragen Sie entscheidend dazu bei, Ihr Risiko für das erneute Auftreten depressiver Symptome zu reduzieren.

Sie haben nun viele Informationen rund um Ihr seelisches Wohlbefinden und dessen Förderung erhalten. Im zweiten Teil unseres Briefes möchten wir uns nun wieder dem gesundheitsverträglichen Umgang mit Alkohol widmen.

### Wo stehen Sie?

Sie machen sich nach wie vor Gedanken über den Alkoholkonsum. Gleichzeitig sind Sie nicht ausreichend überzeugt, dass Sie daran etwas ändern möchten. Wir möchten Ihnen hiermit einige Anregungen und Informationen geben.

### Erinnern Sie sich an die Grenzen risikoarmen Alkoholkonsums?

Gesunde Männer sollten:

- insgesamt höchstens 14 kleine Getränke in der Woche
- und dabei höchstens 4 kleine Getränke zu einer Gelegenheit trinken.

Wenn Männer (fast) jeden Tag Alkohol trinken, sollten sie höchstens 2 kleine Getränke am Tag trinken. Wenn Sie mit Alkohol unvereinbare Medikamente nehmen oder wenn Ihnen ein Arzt vom Alkoholkonsum abgeraten hat, dann sollten Sie gänzlich darauf verzichten.

Ein kleines  
Getränk  
beinhaltet:

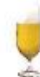

0,25 – 0,3 l Bier

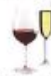

0,1 – 0,15 l  
Wein/Sekt

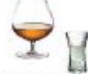

4 cl Spirituosen

### Ihre Trinkmenge im Vergleich

Wenn Sie wissen möchten, wie viel Sie nun im Vergleich zu anderen Männern trinken, können Sie dies der Abbildung entnehmen. Ihr Alkoholkonsum pro Woche liegt innerhalb des dunklen Tortenstücks.

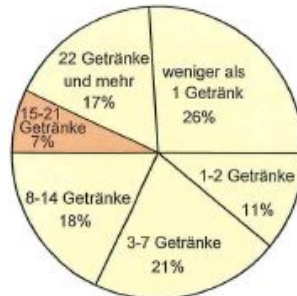

Damit trinken sie mehr Alkohol als 76% der Männer zwischen 18 und 65 Jahren

Verglichen mit Ihren Angaben der letzten Befragung haben Sie die Anzahl alkoholischer Getränke pro Woche um die Hälfte erhöht.

### Einschätzung Ihres persönlichen Risikos

Die Abbildung zeigt, wie hoch bei Ihrem Alkoholkonsum das Risiko für negative Folgen ist. Berücksichtigt sind gesundheitliche, psychische und soziale Folgen.

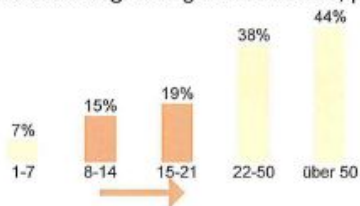

Personen mit der von Ihnen angegebenen Trinkmenge müssen mit einer Wahrscheinlichkeit von etwa 19% mit negativen Folgen des Alkoholkonsums rechnen.

Damit hat sich Ihr persönliches Risiko um ein Viertel erhöht.

### Hohe Trinkmenge zu einer Gelegenheit

Des Öfteren trinken Sie mehr als 4 kleine alkoholische Getränke zu einer Gelegenheit. Damit erhöhen Sie Ihr Risiko für negative Folgen des Alkoholkonsums **zusätzlich**. Sie können Ihr derzeitiges Risiko deutlich vermindern, wenn Sie zukünftig höchstens 4 kleine Getränke zu einer Gelegenheit und höchstens 14 pro Woche trinken.

### Für Sie überwiegen nach wie vor die unangenehmen Seiten des Alkoholtrinkens.

Das finden Sie gut am Alkoholtrinken: Es hilft Ihnen zu entspannen und locker zu sein und sich zu äußern.

Gut ist, dass Sie die folgenden Nachteile riskanten Alkoholkonsums in Ihre Entscheidung, Alkohol zu trinken oder nicht zu trinken, einfließen lassen:

- Sie schaden Ihrer Gesundheit.
- Sie nehmen an Körpergewicht zu.
- Sie sind körperlich weniger leistungsfähig.

***Im Vergleich zu anderen Menschen ...***

... erscheinen Ihnen die unangenehmen Seiten als bedeutsamer. Diese kritische Sichtweise ist wirklich lobenswert!

**Bleiben Sie am Ball**

Auf dem Weg zur langfristigen Stabilisierung Ihres seelischen Wohlbefindens sind Sie weit fortgeschritten. Sie haben es geschafft, seit einiger Zeit Strategien zur Förderung des seelischen Wohlbefindens in Ihren Alltag zu integrieren. Das ist ein sehr schöner Erfolg und wir gratulieren Ihnen herzlich.

Auf dem Weg risikoarm zu trinken, haben Sie bereits eine entscheidende Hürde genommen: Sie denken darüber nach, die Grenzen risikoarmen Konsums einzuhalten.

Wir hoffen, Ihnen hilfreiche Informationen gegeben zu haben, die Sie für Ihr Wohlbefinden und Ihre Gesundheit nutzen können. In den kommenden Tagen werden wir Ihnen einen weiteren Brief zukommen lassen, mit Empfehlungen, die Sie bei Ihren Vorhaben unterstützen sollen.

Bis dahin wünschen wir Ihnen, sehr geehrter Herr Doe, alles Gute!

Mit freundlichen Grüßen  
Ihr Gesünder Leben Team



Prof. Dr. C. Meyer



Dipl.-Psych. K. Krause



Dipl.-Psych. D. Gürtler

## Participant A: Letter 6

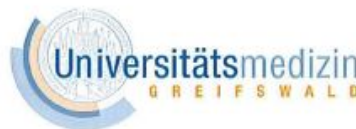

Institut für Sozialmedizin und Prävention, Walther-Rathenau-Str. 48, 17475 Greifswald

Institut für Sozialmedizin und Prävention  
Direktor: Prof. Dr. U. John

Ihr Ansprechpartner:

Walther-Rathenau-Str. 48  
17475 Greifswald  
Telefon:  
Telefax:  
E-Mail:

Datum: 00. XXXXX 0000

Herr  
John Doe  
XXXXXXXXXXXX  
00000 XXXXXXXXXX

### Ihre neue Rückmeldung zur Studie "Gesünder Leben"

Sehr geehrter Herr Doe,

hiermit erhalten Sie den zweiten Teil Ihrer persönlichen Rückmeldung zu Ihren Angaben aus der dritten telefonischen Befragung.

Die Abbildung zeigt noch einmal Ihre Motivation zur Anwendung der Strategien. Sie tun bereits aktiv etwas für Ihr seelisches Wohlbefinden, indem Sie sich an den meisten Tagen der Woche Zeit für angenehme Aktivitäten nehmen.

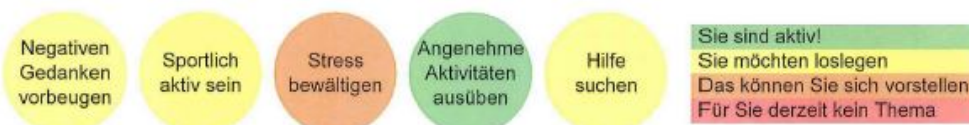

### Was treibt Sie an?

Die Verbesserung Ihres seelischen Wohlbefindens kann ein entscheidender Antrieb bei der Veränderung Ihrer Gewohnheiten sein.

Insgesamt sind Sie nach wie vor überzeugt, dass sich die fünf Strategien positiv auf Ihr seelisches Wohlbefinden auswirken. Positive Auswirkungen auf Ihr seelisches Wohlbefinden erwarten Sie insbesondere auch durch die Strategie, die Sie bereits in Ihrem Alltag anwenden. Dies wird Ihnen helfen am Ball zu bleiben.

Die Abbildung zeigt Ihnen für jede Strategie, inwieweit Sie Verbesserungen Ihres seelischen Wohlbefindens durch deren Anwendung erwarten. Wie Sie sehen, trauen Sie positive Einflüsse nicht nur der Strategie zu, die Sie bereits anwenden. Vielleicht ein Argument dafür, auch bei anderen Strategien einen nächsten Schritt zu wagen.

Zurzeit halten Sie positive Auswirkungen der Strategien auf Ihr seelisches Wohlbefinden für ...

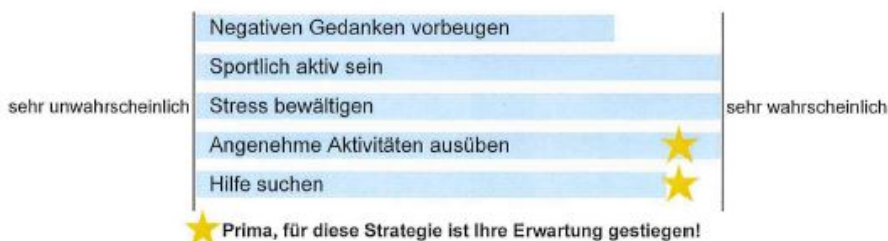



Es kann nützlich sein sich zu überlegen, welche weiteren Vorteile die Strategien zur Förderung des seelischen Wohlbefindens für Sie persönlich bereithalten könnten. Vielleicht fallen Ihnen Punkte ein, an die Sie bisher noch gar nicht gedacht haben, die Ihnen jedoch wichtig sind. Dies kann Ihnen helfen, Sie in Ihren Absichten zu bestärken.

#### **Sie fördern bereits Ihr seelisches Wohlbefinden – Wie kommen Sie weiter?**

Es gibt eine ganze Reihe von Tricks und Techniken, die Sie bei der langfristigen Förderung Ihres seelischen Wohlbefindens unterstützen können. Bei vielen Menschen haben sich die folgenden Empfehlungen bewährt. Sind auch für Sie geeignete Anregungen dabei?

##### **■ Nutzen Sie Erinnerungshilfen, meiden Sie schwierige Situationen**

Manchen Menschen hilft es, sich Erinnerungen an ihre Vorhaben, z.B. in ihrer Wohnung, zu platzieren und Menschen und Situationen, die sie davon abhalten können, zu meiden. Sie nutzen diese Strategien nach wie vor eher wenig. Im Vergleich zu unserer letzten Befragung probieren Sie dies jedoch schon häufiger. Was könnte Sie auch in Zukunft erfolgreich an Ihre Vorhaben erinnern und in welchen Situationen könnte Ihnen die Förderung des seelischen Wohlbefindens weiterhin schwer fallen?

##### **■ Seien Sie stolz auf sich ...**

... wenn Sie es schaffen, regelmäßig Ihr seelisches Wohlbefinden zu fördern. Vor einigen Wochen ist Ihnen dies noch häufiger gelungen. Lassen Sie dieses Gefühl wieder öfter zu. Es wird Ihnen helfen, Ihren Glauben an die eigenen Fähigkeiten weiter zu stärken.

##### **■ Halten Sie an Ihrem Entschluss fest**

Ihnen ist inzwischen noch häufiger bewusst, dass Sie Ihr seelisches Wohlbefinden verbessern können, wenn Sie es wollen. Das ist sehr hilfreich, um Ihre Pläne dauerhaft erfolgreich umzusetzen.

#### **Ihre Zuversicht**

Untersuchungen belegen einen Zusammenhang zwischen der erfolgreichen Änderung von Gewohnheiten und unserer Zuversicht, dies zu schaffen. Insgesamt sind Sie weiterhin zuversichtlich, die Strategien zur Förderung des seelischen Wohlbefindens erfolgreich umsetzen zu können. Dass Sie die Strategie, die Sie bereits anwenden weiterhin erfolgreich umsetzen können, steht für Sie außer Frage. Das ist eine gute Voraussetzung, um in Ihren Bemühungen auch zukünftig erfolgreich zu sein. Ihre Zuversicht zur Ausübung jeder einzelnen Strategie können Sie der Abbildung entnehmen. Wie Sie sehen, ist die Strategie, die Sie bereits anwenden, nicht die einzige, deren erfolgreiche Umsetzung Sie sich zutrauen. Dies mag ein weiteres Argument dafür sein, zusätzliche Schritte zur Förderung des seelischen Wohlbefindens zu unternehmen. Entscheiden Sie selbst, wie viel Sie leisten können.

##### **Ihre derzeitige Zuversicht, die Strategien (weiterhin) ausüben zu können ist ...**

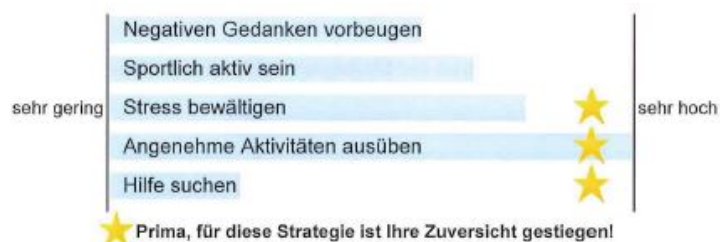

### **Werden Sie sich Ihrer Stärken weiterhin bewusst.**

Auch heute gibt es keine Strategie, für deren erfolgreiche Umsetzung es Ihnen grundsätzlich an Zuversicht fehlt. Um sich Ihrer Stärken weiterhin bewusst zu werden, führen Sie sich erneut vor Augen, warum das so ist. Was hat Sie bewogen, Ihre Zuversicht nicht geringer einzuschätzen? Überlegen Sie auch noch einmal, welche Ihrer Stärken und Eigenschaften Ihnen bei früheren Herausforderungen geholfen haben. Inwieweit konnten diese auch jetzt behilflich sein?

Sie haben nun viele Informationen erhalten, die Sie zur Förderung Ihres seelischen Wohlbefindens nutzen können. Im zweiten Teil unseres Briefes mochten wir den Schwerpunkt nun wieder auf den gesundheitsvertraglichen Umgang mit Alkohol lenken.

### **Sie denken darüber nach weniger Alkohol zu konsumieren – Wie kommen Sie weiter?**

Die folgenden Empfehlungen haben sich in vielen Fällen bewährt und können Sie bei dem Ziel, risikoarm zu trinken, unterstützen. Ob auch für Sie geeignete Anregungen dabei sind, entscheiden Sie allein.

#### **▣ Seien Sie offen für Informationen.**

Verglichen mit anderen nehmen Sie Informationen zu den negativen Auswirkungen des Alkoholtrinkens nach wie vor wenig wahr. Viele Menschen meiden bewusst Informationen zu den Gesundheitsrisiken. Achten Sie in der nächsten Zeit einmal auf solche Informationen, z. B. in den Medien.

#### **▣ Besinnen Sie sich auf Ihre Prinzipien.**

Es kann für Sie erneut sinnvoll sein, zu überlegen, inwiefern das Alkoholtrinken und Ihre Prinzipien nicht übereinstimmen. Ist es zum Beispiel schon einmal vorgekommen, dass Sie sich nach einer Feier über einen Kater geärgert haben und Sie den folgenden Tag dadurch nicht wie geplant verbringen konnten?

### **Achtung: Kritische Situationen!**

Jeder trinkt in ganz bestimmten Situationen besonders gern ein alkoholisches Getränk. Diese machen es einem schwer, seine Trinkgewohnheiten zu verändern. Es ist daher wichtig, sich vorher zu überlegen, wie man in solchen Situationen angemessen reagieren kann.

Sie haben ein vergleichsweise hohes Zutrauen in Ihre Fertigkeiten, auch in kritischen Situationen bei Ihren Zielen zu bleiben. Das sind gute Voraussetzungen, falls Sie planen, etwas an Ihrem Alkoholkonsum zu ändern.

Ihnen fällt es besonders in negativen Stimmungen schwer, wenig bzw. keinen Alkohol zu trinken. Folgendes kann hilfreich sein:

- Alternativen entwickeln,
- Musik hören, sich entspannen,
- Stressige Situationen meiden,
- Mit Freunden sprechen,
- Sich daran erinnern, dass Alkohol keine Probleme löst.

### **Bleiben Sie am Ball!**

Wir hoffen, Ihnen auch mit diesem Brief wertvolle Informationen gegeben zu haben, die Sie für Ihr Wohlbefinden und Ihre Gesundheit nutzen können. Wir werden Sie weiterhin durch unsere wöchentliche SMS-Nachricht begleiten. In etwa 6 Wochen möchten wir Sie dann zu unserer vierten telefonischen Befragung einladen. Bleiben Sie neugierig!

Wir wünschen Ihnen, sehr geehrter Herr Doe, alles Gute und viel Erfolg!

Mit freundlichen Grüßen  
Ihr Gesünder Leben Team



Prof. Dr. C. Meyer



Dipl.-Psych. K. Krause



Dipl.-Psych. D. Gürtler

## Participant B: Letter 1

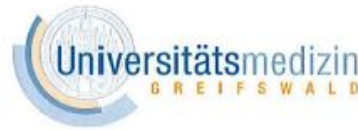

Institut für Sozialmedizin und Prävention, Walther-Rathenau-Str. 48, 17475 Greifswald

Institut für Sozialmedizin und Prävention  
Direktor: Prof. Dr. U. John

Ihr Ansprechpartner:

Frau  
Jane Doe  
XXXXXX 00  
00000 XXXXXX

Walther-Rathenau-Str. 48  
17475 Greifswald  
Telefon:  
Telefax:  
E-Mail:

Datum: 00. XXXXX 0000

### Ihre persönliche Rückmeldung zur Studie "Gesünder Leben"

Sehr geehrte Frau Doe,

vielen Dank für Ihre Teilnahme an dem telefonischen Gespräch. Wie versprochen erhalten Sie heute eine Rückmeldung zu Ihren persönlichen Angaben.

#### Das seelische Wohlbefinden fördern - auch für Sie ein Thema

Zum Zeitpunkt unseres telefonischen Gesprächs ließ sich keine Beeinträchtigung Ihres seelischen Wohlbefindens feststellen. Darüber freuen wir uns! Innerhalb des letzten Jahres gab es jedoch mehrere Phasen in denen Sie die Symptome einer Depression erlebt haben. Die von Ihnen berichtete Symptomatik entspricht dem Schweregrad einer schweren depressiven Erkrankung. Hier wäre es wichtig, Unterstützung durch einen Arzt oder Psychologen zu erhalten. In jedem Fall zeigt Ihnen diese Erfahrung, dass es für Sie wichtig ist, langfristig etwas für Ihr seelisches Gleichgewicht zu tun.

#### Seelisch im Gleichgewicht bleiben

Das seelische Wohlbefinden ist ein ganz wesentlicher Teil unserer Gesundheit. Stress und anhaltende Belastungen können es allerdings aus dem Gleichgewicht bringen. Viele Menschen erleben dann Phasen von Niedergeschlagenheit, Traurigkeit, Lustlosigkeit und Erschöpfung. Dies können erste Anzeichen einer depressiven Erkrankung sein. Forschungsergebnisse belegen, dass wir aktiv dazu beitragen können, diese Phasen zu verkürzen oder sie ganz zu vermeiden. Dabei haben sich die folgenden fünf Strategien als geeignet herausgestellt:

1. Negativen Gedanken etwas Positives entgegensetzen - Beugen Sie negativen Gedanken vor oder unterbrechen Sie Grübeln gezielt, indem Sie sich z.B. die eigenen Stärken oder angenehme Erlebnisse bewusst machen.
2. An den meisten Tagen der Woche sportlich aktiv sein - Regelmäßige Bewegung stärkt nicht nur Ihren Körper, sondern hilft auch, seelisch im Gleichgewicht zu bleiben.
3. Regelmäßig etwas tun, um mit Stress besser umzugehen - Teilen Sie sich Ihre Zeit gut ein und planen Sie Ihre Tage. Auch regelmäßige Entspannungsübungen helfen Ihnen, mit Stress umzugehen.



4. Ausüben angenehmer Aktivitäten an den meisten Tagen der Woche - Tun Sie Dinge, die Ihnen wichtig sind, Ihnen gut tun oder aus denen Sie Kraft schöpfen. Bleiben Sie auch dann aktiv, wenn die Stimmung mal am Boden ist. Jede Aktivität ist ein wichtiger Schritt.

5. Sich Hilfe suchen, wenn Probleme Sie belasten - Freunde und Familie können eine erste Anlaufstelle bei Alltagsproblemen sein. Oft ist auch ein Gespräch mit Fachleuten, wie z.B. Ihrem Hausarzt, oder das Aufsuchen einer Beratungsstelle hilfreich.

#### Wo stehen Sie?

Die Abbildung zeigt Ihre Motivation zur Ausübung der Strategien. Sie tun bereits einiges für Ihr seelisches Wohlbefinden, indem Sie 3 der genannten Strategien in Ihrem Alltag nutzen. Darauf können Sie stolz sein! Dies wird Ihnen helfen, langfristig im seelischen Gleichgewicht zu bleiben.

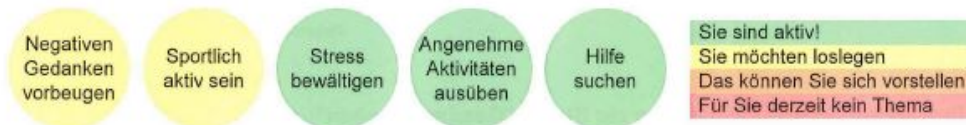

#### Was Sie zum Thema Depressionen wissen sollten

Viele Menschen haben die gleichen Erfahrungen wie Sie gemacht. Etwa 10,4% der Frauen im Alter von 50-59 Jahren erleben behandlungsbedürftige depressive Symptome. Trotz derzeitiger Symptommfreiheit sollten Sie solche Episoden auf keinen Fall auf die leichte Schulter nehmen. Dass Sie bereits Strategien zur Förderung des seelischen Wohlbefindens in Ihrem Alltag anwenden, hilft Ihnen, einem erneuten Auftreten solcher oder gar schlimmerer Phasen entgegenzuwirken. Gleichzeitig beugen Sie auch weiteren Erkrankungen vor. So senken Sie beispielsweise Ihr Risiko für die sogenannte Zuckerkrankheit (Diabetes), für Herz-Kreislauf-Erkrankungen und für die Entwicklung geistiger Beeinträchtigungen im höheren Lebensalter.

Die Deutsche Depressionshilfe bietet auf ihren Internetseiten ([www.deutsche-depressionshilfe.de](http://www.deutsche-depressionshilfe.de)) ausführlichere Informationen zu Symptomen, Ursachen und Behandlungsmöglichkeiten depressiver Erkrankungen. Wenn Sie möchten, schauen Sie sich diese doch einmal an.

#### Die Alkoholfalle bei Depressionen

Wenn man sich nicht besonders gut fühlt, besteht die Gefahr, dass Alkohol gezielt als "Seelenröster" eingesetzt wird. Zwar mag Alkohol kurzfristig Erleichterung verschaffen, auf lange Sicht werden Probleme und Stimmungstiefs aber noch verstärkt. Aufgrund der wechselseitigen Beeinflussung von Depression und Alkohol möchten wir Ihnen hier ebenfalls eine Rückmeldung zu Ihrem Alkoholkonsum geben.

Wenn Sie ausführlichere Informationen zum Zusammenspiel von Alkohol und Depressionen wünschen, empfehlen wir Ihnen folgende Internetseite der Aktion „Alkohol? Kenn dein Limit.“: <http://www.kenn-dein-limit.info/news/artikel/alkohol-retter-in-der-not.html>

#### Wo stehen Sie?

Sie denken hin und wieder über Ihren Alkoholkonsum nach. Aber derzeit sind Sie noch nicht überzeugt, dass Sie daran etwas ändern möchten. Wir möchten Ihnen hiermit einige Anregungen und Informationen geben.

### Was ist risikoarmer Alkoholkonsum?

Die meisten Menschen müssen nicht komplett auf Alkohol verzichten, um sich gesundheitsbewusst zu verhalten. Die Grenzen risikoarmen Alkoholkonsums sind jedoch kaum bekannt:

Gesunde Frauen sollten:

- insgesamt höchstens 7 kleine Getränke in der Woche
- und dabei höchstens 3 kleine Getränke zu einer Gelegenheit trinken.

Wenn Frauen (fast) jeden Tag Alkohol trinken, sollten sie höchstens ein kleines Getränk am Tag trinken. Wenn Sie mit Alkohol unvereinbare Medikamente nehmen oder wenn Ihnen ein Arzt vom Alkoholkonsum abgeraten hat, dann sollten Sie gänzlich darauf verzichten.

Ein kleines Getränk beinhaltet:

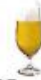

0,25 – 0,3 l  
Bier

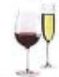

0,1 – 0,15 l  
Wein/Sekt

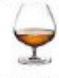

4 cl Spirituosen

### Ihre Trinkmenge im Vergleich

Wenn Sie wissen möchten, wie viel Sie im Vergleich zu anderen Frauen trinken, können Sie dies der Abbildung entnehmen. Ihr Alkoholkonsum pro Woche liegt innerhalb des dunklen Tortenstücks.

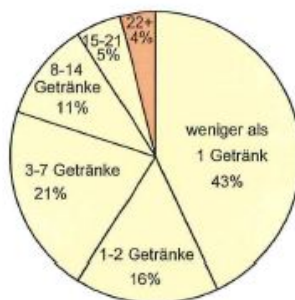

Damit trinken Sie mehr Alkohol als 96% der Frauen zwischen 18 und 65 Jahren

### Einschätzung Ihres persönlichen Risikos

Die Abbildung zeigt, wie hoch bei Ihrem Alkoholkonsum das Risiko für negative Folgen ist. Berücksichtigt sind gesundheitliche, psychische und soziale Folgen.

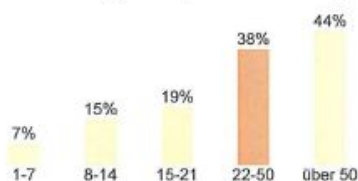

Personen mit der von Ihnen angegebenen Trinkmenge müssen bei einer Wahrscheinlichkeit von etwa 38% mit negativen Folgen des Alkoholkonsums rechnen.

### **Hohe Trinkmenge zu einer Gelegenheit**

Des Öfteren trinken Sie mehr als 3 kleine alkoholische Getränke zu einer Gelegenheit. Damit steigt Ihr Risiko für negative Folgen des Alkoholkonsums **zusätzlich**. Sie können Ihr Risiko deutlich senken, indem Sie zukünftig höchstens 3 kleine Getränke zu einer Gelegenheit und höchstens 7 in der Woche trinken.

### **Für Sie überwiegen die unangenehmen Seiten des Alkoholtrinkens**

Das finden Sie gut am Alkoholtrinken: Es hilft Ihnen zu entspannen und sich bei einem geselligen Beisammensein nicht ausgeschlossen zu fühlen.

Gut ist, dass Sie die folgenden Nachteile riskanten Alkoholkonsums in Ihre Entscheidung, Alkohol zu trinken oder nicht zu trinken, einfließen lassen:

- Sie schaden Ihrer Gesundheit.
- Sie nehmen an Körpergewicht zu.

### **Im Vergleich zu anderen Menschen ...**

... finden Sie die unangenehmen Seiten nicht so bedeutsam. Lassen Sie sich einmal folgende Überlegungen in Ruhe durch den Kopf gehen:

- Wenn Sie risikoarm trinken, ist das ein Plus für Ihre Gesundheit.
- Wie sieht Ihre persönliche Pro- und Kontra-Liste zum Thema Alkoholtrinken aus? Welche unangenehmen Dinge verbinden Sie mit Ihrem Alkoholkonsum? Welche Vorteile bringt es wenn Sie risikoarm trinken?

Oft ist es interessant zu überlegen, welche der angenehmen oder unangenehmen Seiten Ihnen momentan am wichtigsten sind. Danach könnten Sie überlegen, welche Ihnen langfristig mehr Vorteile bringen könnten.

### **Bleiben Sie am Ball**

Auf dem Weg zur langfristigen Stabilisierung Ihres seelischen Wohlbefindens sind Sie weit fortgeschritten. Sie haben es geschafft, seit einiger Zeit Strategien zur Förderung des seelischen Wohlbefindens in Ihren Alltag zu integrieren. Das ist ein sehr schöner Erfolg und wir gratulieren Ihnen herzlich. Auf dem Weg risikoarm zu trinken, haben Sie bereits eine entscheidende Hürde genommen: Sie denken darüber nach, weniger zu trinken.

Wir hoffen, Ihnen hilfreiche Informationen gegeben zu haben, die Sie für Ihr Wohlbefinden und Ihre Gesundheit nutzen können. In den kommenden Tagen werden wir Ihnen einen weiteren Brief zukommen lassen, mit Empfehlungen, die Sie bei Ihren Vorhaben unterstützen sollen.

Bis dahin wünschen wir Ihnen, sehr geehrte Frau Doe, alles Gute!

Mit freundlichen Grüßen  
Ihr Gesünder Leben Team



Prof. Dr. C. Meyer



Dipl.-Psych. K. Krause



Dipl.-Psych. D. Gürtler



## Participant B: Letter 2

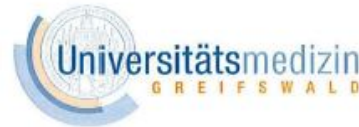

Institut für Sozialmedizin und Prävention, Walther-Rathenau-Str. 48, 17475 Greifswald

Institut für Sozialmedizin und Prävention  
Direktor: Prof. Dr. U. John

Ihr Ansprechpartner:

Walther-Rathenau-Str. 48  
17475 Greifswald  
Telefon:  
Telefax:  
E-Mail:

Datum: 00. XXXXX 0000

Frau  
Jane Doe  
XXXXXX 00  
00000 XXXXXX

### Ihre persönliche Rückmeldung zur Studie "Gesünder Leben"

Sehr geehrte Frau Doe,

hiermit erhalten Sie den zweiten Teil Ihrer Rückmeldung zu Ihren Angaben im Gespräch.

Im letzten Brief haben wir Ihnen Strategien zur Förderung des seelischen Wohlbefindens vorgestellt. Die Abbildung zeigt noch einmal Ihre Motivation zur Ausübung der Strategien. Sie tun bereits einiges für Ihr seelisches Wohlbefinden, indem Sie 3 der genannten Strategien in Ihrem Alltag nutzen.

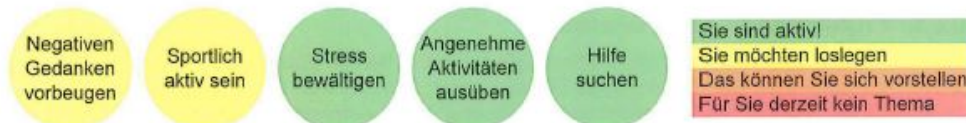

### Was treibt Sie an?

Die Verbesserung Ihres seelischen Wohlbefindens kann ein entscheidender Antrieb bei der Veränderung Ihrer Gewohnheiten sein. Insgesamt können Sie sich vorstellen, dass sich die Strategien, die Sie bereits anwenden, positiv auf Ihr seelisches Wohlbefinden auswirken. Dies wird Ihnen helfen am Ball zu bleiben. Die Abbildung zeigt Ihnen, inwieweit Sie Verbesserungen Ihres seelischen Wohlbefindens durch die Anwendung jeder einzelnen Strategie erwarten.

Zurzeit halten Sie positive Auswirkungen der Strategien auf Ihr seelisches Wohlbefinden für ...

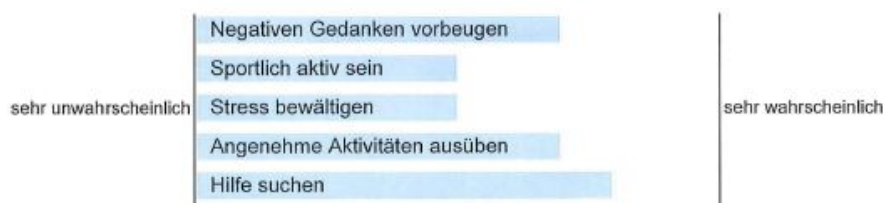

Wie Sie sehen, sind die Strategien, die Sie bereits anwenden, nicht die einzigen, denen Sie einen positiven Einfluss auf Ihr seelisches Wohlbefinden zutrauen. Dies mag ein Argument dafür sein, auch bei anderen Strategien einen nächsten Schritt zu wagen.

Es kann nützlich sein sich zu überlegen, welche weiteren Vorteile die Strategien zur Förderung des seelischen Wohlbefindens für Sie persönlich bereithalten könnten. Vielleicht fallen Ihnen Punkte ein, an die Sie bisher noch gar nicht gedacht haben, die Ihnen jedoch wichtig sind. Dies kann Ihnen helfen, Sie in Ihren Absichten zu bestärken.

#### **Sie fördern bereits Ihr seelisches Wohlbefinden – Wie kommen Sie weiter?**

Es gibt eine ganze Reihe von Tricks und Techniken, die Sie bei der langfristigen Förderung Ihres seelischen Wohlbefindens unterstützen können. Bei vielen Menschen haben sich die folgenden Empfehlungen bewährt. Sind auch für Sie geeignete Anregungen dabei?

##### **▣ Lassen Sie sich unterstützen**

Nutzen Sie die Freiräume, die Ihr Umfeld Ihnen zur Förderung Ihres seelischen Wohlbefindens bietet. Sprechen Sie Personen an, die Sie bei Ihren Vorhaben unterstützen können. Gemeinsam können Sie dann entscheiden, wie die Unterstützung aussehen könnte.

##### **▣ Seien Sie stolz auf sich**

In der heutigen, oft stressigen Zeit ist es nicht selbstverständlich, sich regelmäßig Zeit zur Förderung seines seelischen Wohlbefindens zu nehmen. Es macht Sie stolz, wenn Sie es dennoch schaffen. Denken Sie an dieses Gefühl, wenn es Ihnen einmal schwerer fällt, sich aufzuraffen.

##### **▣ Halten Sie an Ihrem Entschluss fest**

Ihnen ist bewusst, dass Sie Ihr seelisches Wohlbefinden verbessern können, wenn Sie es wollen. Das ist sehr hilfreich, um Ihre Pläne dauerhaft erfolgreich umzusetzen.

#### **Sie sind zuversichtlich, es zu schaffen**

Insgesamt sind Sie zuversichtlich, die Strategien, die Sie bereits anwenden, weiterhin erfolgreich umsetzen zu können. Das ist eine gute Voraussetzung, um in Ihren Bemühungen auch zukünftig erfolgreich zu sein. Ihre Zuversicht zur Ausübung jeder einzelnen Strategie können Sie der Abbildung entnehmen. Wie Sie sehen, sind die Strategien, die Sie bereits anwenden, nicht die einzigen, deren erfolgreiche Umsetzung Sie sich zutrauen. Dies mag ein weiteres Argument dafür sein, zusätzliche Schritte zur Förderung des seelischen Wohlbefindens zu unternehmen. Entscheiden Sie selbst, wie viel Sie leisten können.

##### **Ihre derzeitige Zuversicht, die Strategien (weiterhin) ausüben zu können ist ...**

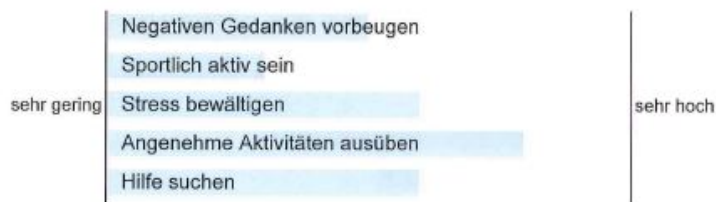

#### **Werden Sie sich Ihrer Stärken bewusst.**

Verhaltensänderungen und deren dauerhafte Aufrechterhaltung stellen immer besondere Herausforderungen dar. Wie haben Sie bisherige Herausforderungen gemeistert? Welche Eigenschaften, welche Stärken haben Ihnen geholfen? Inwieweit könnten diese auch jetzt behilflich sein?

Sie haben nun viele Informationen erhalten, die Sie zur Förderung Ihres seelischen Wohlbefindens nutzen können. Im zweiten Teil unseres Briefes möchten wir den Schwerpunkt nun wieder auf den gesundheitsverträglichen Umgang mit Alkohol lenken.

**Sie denken darüber nach weniger Alkohol zu konsumieren – Wie kommen Sie weiter?**

Die folgenden Empfehlungen haben sich in vielen Fällen bewährt und können Sie bei dem Ziel, risikoarm zu trinken, unterstützen. Ob auch für Sie geeignete Anregungen dabei sind, entscheiden Sie allein.

**■ Seien Sie offen für Informationen**

Verglichen mit anderen nehmen Sie Informationen über negative Auswirkungen des Alkoholtrinkens eher wenig wahr. Viele Menschen meiden bewusst Informationen zu den Gesundheitsrisiken des Alkoholkonsums. Es könnte hilfreich sein, diesen Dingen mehr Aufmerksamkeit zu schenken.

**■ Besinnen Sie sich auf Ihre Prinzipien**

An einigen Punkten stimmt für Sie das Alkoholtrinken nicht mit Ihren Prinzipien überein. Das mag ein Argument sein, weiter über Vorteile einer möglichen Änderung nachzudenken.

**Achtung: Kritische Situationen!**

Jeder trinkt in ganz bestimmten Situationen besonders gern ein alkoholisches Getränk. Diese machen es einem schwer, seine Trinkgewohnheiten zu ändern. Es ist daher wichtig, sich vorher zu überlegen, wie man in solchen Situationen angemessen reagieren kann.

Sie haben vergleichsweise wenig Zutrauen in Ihre Fertigkeiten, auch in kritischen Situationen bei Ihren Zielen zu bleiben. Dies ist für Sie vielleicht ein großes Hindernis, konkrete Veränderungen zu planen. Überlegen Sie einmal: Was sind das für Situationen und wie können Sie mit diesen besser umgehen? Welche Alternativen zum Alkoholtrinken könnte es dabei für Sie geben?

Ihnen fällt es besonders in guter Stimmung und in sozialen Situationen schwer, wenig bzw. keinen Alkohol zu trinken. Folgendes kann hilfreich sein:

- Meiden Sie zunächst Situationen, in denen viel Alkohol getrunken wird.
- Überlegen Sie sich vorher, wie viel Gläser Alkohol Sie maximal trinken möchten.
- Weisen Sie Angebote, Alkohol zu trinken, deutlich zurück.

**Bleiben Sie am Ball!**

Wir hoffen, Ihnen auch mit diesem Brief wertvolle Informationen gegeben zu haben, die Sie für Ihr Wohlbefinden und Ihre Gesundheit nutzen können. Wir werden Sie weiterhin durch unsere wöchentliche SMS-Nachricht begleiten. In etwa 6 Wochen möchten wir Sie zu unserer zweiten telefonischen Befragung einladen. Bleiben Sie neugierig!

Wir wünschen Ihnen, sehr geehrte Frau Doe, alles Gute und viel Erfolg!

Mit freundlichen Grüßen  
Ihr Gesünder Leben Team



Prof. Dr. C. Meyer



Dipl.-Psych. K. Krause



Dipl.-Psych. D. Gürtler



## Participant B: Letter 3

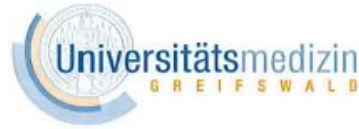

Institut für Sozialmedizin und Prävention, Walther-Rathenau-Str. 48, 17475 Greifswald

Institut für Sozialmedizin und Prävention  
Direktor: Prof. Dr. U. John

Ihr Ansprechpartner:

Walther-Rathenau-Str. 48  
17475 Greifswald  
Telefon:  
Telefax:  
E-Mail:

Datum: 00. XXXXX 0000

Frau  
Jane Doe  
XXXXXX 00  
00000 XXXXXX

### Ihre neue Rückmeldung zur Studie "Gesünder Leben"

#### Sehr geehrte Frau Doe,

vielen Dank, dass Sie an unserer zweiten telefonischen Befragung teilgenommen haben. Sie erhalten nun eine neue persönliche Rückmeldung, in der wir Ihnen Veränderungen seit der ersten Befragung mitteilen.

#### Das seelische Wohlbefinden fördern - auch für Sie ein Thema

Innerhalb der letzten zwei Monate kam es mehrfach zu Phasen, in denen Sie die Symptome einer Depression erlebt haben. Die von Ihnen berichtete Symptomatik entspricht dem Schweregrad einer milden depressiven Erkrankung. Sie ist somit weniger stark ausgeprägt als Sie es aus früheren Episoden bereits kennen. Diese Erfahrung zeigt Ihnen jedoch erneut, dass es für Sie wichtig ist, langfristig etwas für Ihr seelisches Gleichgewicht zu tun.

#### Seelisch im Gleichgewicht bleiben

Erinnern Sie sich noch an die fünf Strategien zur Förderung Ihres seelischen Wohlbefindens, die wir Ihnen vorgestellt haben? Diese waren:

1. Negativen Gedanken etwas Positives entgegensetzen
2. An den meisten Tagen der Woche sportlich aktiv sein
3. Regelmäßig etwas tun, um mit Stress besser umzugehen
4. Ausüben angenehmer Aktivitäten an den meisten Tagen der Woche
5. Sich Hilfe suchen, wenn Probleme Sie belasten

#### Wo stehen Sie?

In den letzten Wochen haben Sie zum Teil neue Wege bei der Förderung Ihres seelischen Wohlbefindens eingeschlagen, binden jedoch weiterhin 3 der Strategien in Ihren Alltag ein. Darauf können Sie stolz sein. Machen Sie weiter so! Sie sind auf einem guten Weg zu einem gesundheitsbewussteren Leben und zur langfristigen Wahrung Ihres seelischen Gleichgewichts. Die Abbildung zeigt Ihnen für jede Strategie Ihre aktuelle Motivation diese anzuwenden. Nicht alle Vorhaben sind geblieben. Vielleicht können Sie diese neue Rückmeldung nutzen, um auch frühere Überlegungen noch einmal aufzufrischen.

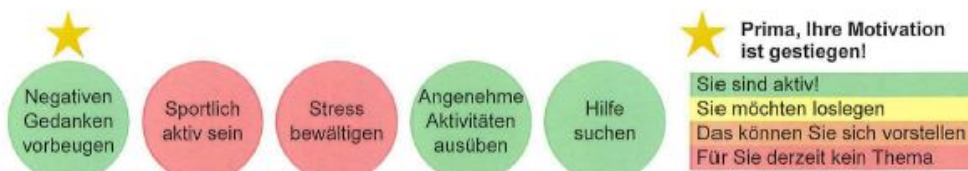

### Dem Wiederauftreten entgegenwirken

Bei vielen Menschen kommt es wiederholt zu Phasen, in denen Sie depressive Symptome erleben. Diese Erfahrung haben auch Sie gemacht. Dies zeigt Ihnen, wie wichtig es ist, auch in Zeiten, in denen Sie sich wohl und ausgeglichen fühlen, etwas für Ihr seelisches Wohlbefinden zu tun. Wie sich eine erneute Symptomatik äußert, lässt sich nicht vorhersagen. Erneute schwere Verläufe lassen sich jedoch nicht ausschließen. Indem Sie bereits Strategien zur Förderung Ihres seelischen Wohlbefindens in Ihrem Alltag anwenden, tragen Sie entscheidend dazu bei, Ihr Risiko für das erneute Auftreten depressiver Symptome zu reduzieren.

Sie haben nun viele Informationen rund um Ihr seelisches Wohlbefinden und dessen Förderung erhalten. Im zweiten Teil unseres Briefes möchten wir uns nun wieder dem gesundheitsverträglichen Umgang mit Alkohol widmen.

### Wo stehen Sie?

Sie möchten Ihren Alkoholkonsum ändern. Ihre Überlegungen, etwas an Ihrem Trinkverhalten zu ändern, haben sich seit unserer ersten Befragung gefestigt. Sehr gut! Damit haben Sie einen wichtigen Schritt zu einem gesundheitsbewussten Leben getan. Wir möchten Ihnen hiermit individuelle Tipps und Anregungen für Ihre weitere Planung geben.

### Erinnern Sie sich an die Grenzen risikoarmen Alkoholkonsums?

Gesunde Frauen sollten:

- insgesamt höchstens 7 kleine Getränke in der Woche
- und dabei höchstens 3 kleine Getränke zu einer Gelegenheit trinken.

Wenn Frauen (fast) jeden Tag Alkohol trinken, sollten sie höchstens ein kleines Getränk am Tag trinken. Wenn Sie mit Alkohol unvereinbare Medikamente nehmen oder wenn Ihnen ein Arzt vom Alkoholkonsum abgeraten hat, dann sollten Sie gänzlich darauf verzichten.

Ein kleines Getränk beinhaltet:

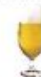

0,2 – 0,3 l Bier

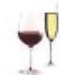

0,1 – 0,15 l Wein/Sekt

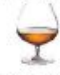

4 cl Spirituosen

### Ihre Trinkmenge im Vergleich

Wenn Sie wissen möchten, wie viel Sie nun im Vergleich zu anderen Frauen trinken, können Sie dies der Abbildung entnehmen. Ihr Alkoholkonsum pro Woche liegt innerhalb des dunklen Tortenstücks.

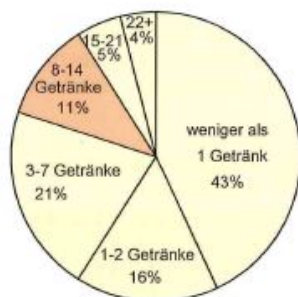

Damit trinken sie mehr Alkohol als 80% der Frauen zwischen 18 und 65 Jahren



Verglichen mit Ihren Angaben der ersten Befragung haben Sie die Anzahl alkoholischer Getränke pro Woche um mehr als die Hälfte gesenkt.

#### Einschätzung Ihres persönlichen Risikos

Die Abbildung zeigt, wie hoch bei Ihrem Alkoholkonsum das Risiko für negative Folgen ist. Berücksichtigt sind gesundheitliche, psychische und soziale Folgen.

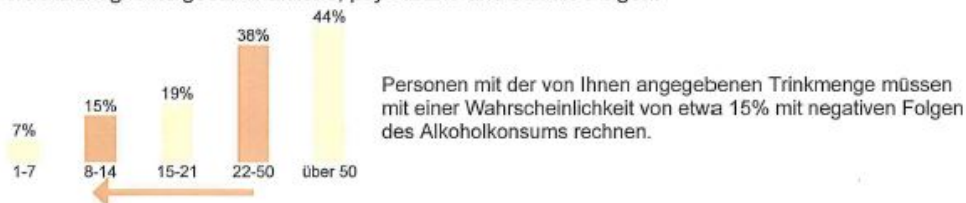

Damit haben Sie Ihr persönliches Risiko um mehr als die Hälfte gesenkt.

#### Keine zu hohe Trinkmenge zu einer Gelegenheit

In letzter Zeit ist es Ihnen gelungen, nicht mehr als 3 kleine Getränke zu einer Gelegenheit zu trinken. Herzlichen Glückwunsch! Vielleicht fällt es Ihnen dadurch leichter, zudem pro Woche nicht mehr als insgesamt 7 kleine Getränke zu trinken.

#### Für Sie überwiegen zurzeit die angenehmen Seiten des Alkoholtrinkens.

In den letzten zwei Monaten haben die Nachteile des Alkoholtrinkens für Sie an Bedeutung verloren. Sie machen sich derzeit nicht so viele Gedanken über die unangenehmen Seiten oder empfinden die angenehmen Seiten des Alkoholtrinkens als wichtiger. Das finden Sie gut am Alkoholtrinken: Es hilft Ihnen zu entspannen; sich bei einem geselligen Beisammensein nicht ausgeschlossen zu fühlen und Spaß und Kontakt mit anderen zu haben.

Gut ist, dass Sie den folgenden Nachteil riskanten Alkoholkonsums in Ihre Entscheidung, Alkohol zu trinken oder nicht zu trinken, einfließen lassen:

- Sie schaden Ihrer Gesundheit.

#### Im Vergleich zu anderen Menschen ...

... finden Sie die unangenehmen Seiten nicht so bedeutsam. Erstellen Sie doch einmal Ihre persönliche Pro-Kontra-Liste. Welche anderen Nachteile hat das Alkoholtrinken für Sie? Welche Vorteile bringt es, wenn Sie risikoarm trinken? Hängen Sie die Liste gut sichtbar auf und ergänzen Sie diese, sobald Ihnen neue Argumente einfallen.

Oft ist es interessant zu überlegen, welche der angenehmen oder unangenehmen Seiten Ihnen momentan am wichtigsten sind. Danach könnten Sie überlegen, welche Ihnen langfristig mehr Vorteile bringen könnten.

#### Bleiben Sie am Ball!

Auf dem Weg zur langfristigen Stabilisierung Ihres seelischen Wohlbefindens sind Sie weit fortgeschritten. Sie haben es geschafft, seit einiger Zeit Strategien zur Förderung des seelischen Wohlbefindens in Ihren Alltag zu integrieren. Das ist ein sehr schöner Erfolg und wir gratulieren Ihnen herzlich.

Auf dem Weg risikoarm zu trinken, haben Sie in den letzten Wochen eine entscheidende Hürde genommen: Sie planen ganz konkret weniger zu trinken. Sehr gut!

Wir hoffen, Ihnen hilfreiche Informationen gegeben zu haben, die Sie für Ihr Wohlbefinden und Ihre Gesundheit nutzen können. In den kommenden Tagen werden wir Ihnen einen weiteren Brief zukommen lassen, mit Empfehlungen, die Sie bei Ihren Vorhaben unterstützen sollen.

Bis dahin wünschen wir Ihnen, sehr geehrte Frau Doe, alles Gute!

Mit freundlichen Grüßen  
Ihr Gesünder Leben Team



Prof. Dr. C. Meyer



Dipl.-Psych. K. Krause



Dipl.-Psych. D. Gürtler

## Participant B: Letter 4

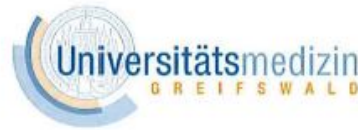

Institut für Sozialmedizin und Prävention, Walther-Rathenau-Str. 48, 17475 Greifswald

Institut für Sozialmedizin und Prävention  
Direktor: Prof. Dr. U. John

Ihr Ansprechpartner:

Frau  
Jane Doe  
XXXXXX 00  
00000 XXXXXX

Walther-Rathenau-Str. 48  
17475 Greifswald  
Telefon:  
Telefax:  
E-Mail:

Datum: 00. XXXXX 0000

### Ihre neue Rückmeldung zur Studie "Gesünder Leben"

Sehr geehrte Frau Doe,

hiermit erhalten Sie den zweiten Teil Ihrer persönlichen Rückmeldung zu Ihren Angaben aus der zweiten telefonischen Befragung.

Die Abbildung zeigt noch einmal Ihre Motivation zur Anwendung der Strategien. Sie tun bereits einiges für Ihr seelisches Wohlbefinden, indem Sie 3 der genannten Strategien in Ihrem Alltag nutzen.

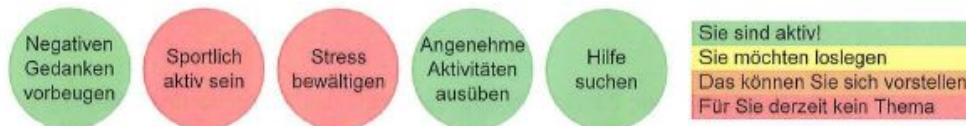

### Was treibt Sie an?

Die Verbesserung Ihres seelischen Wohlbefindens kann ein entscheidender Antrieb bei der Veränderung Ihrer Gewohnheiten sein. Insgesamt können Sie sich nach wie vor vorstellen, dass sich die fünf Strategien positiv auf Ihr seelisches Wohlbefinden auswirken. Dass sich die Strategien, die Sie bereits anwenden, positiv auf dieses auswirken, können Sie sich ebenfalls vorstellen. Dies wird Ihnen helfen am Ball zu bleiben.

Die Abbildung zeigt Ihnen für jede Strategie, inwieweit Sie Verbesserungen Ihres seelischen Wohlbefindens durch deren Anwendung erwarten. Wie Sie sehen, trauen Sie positive Einflüsse nicht nur den Strategien zu, die Sie bereits anwenden. Vielleicht ein Argument dafür, auch bei anderen Strategien einen nächsten Schritt zu wagen.

Zurzeit halten Sie positive Auswirkungen der Strategien auf Ihr seelisches Wohlbefinden für ...

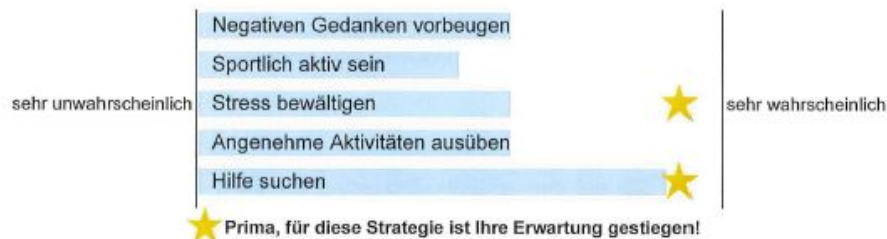

Es kann nützlich sein sich zu überlegen, welche weiteren Vorteile die Strategien zur Förderung des seelischen Wohlbefindens für Sie persönlich bereithalten könnten. Vielleicht fallen Ihnen Punkte ein, an die Sie bisher noch gar nicht gedacht haben, die Ihnen jedoch wichtig sind. Dies kann Ihnen helfen, Ihre Einstellungen zu überdenken und Sie in Ihren Absichten bestärken.

### **Sie fördern bereits Ihr seelisches Wohlbefinden – Wie kommen Sie weiter?**

Es gibt eine ganze Reihe von Tricks und Techniken, die Sie bei der langfristigen Förderung Ihres seelischen Wohlbefindens unterstützen können. Bei vielen Menschen haben sich die folgenden Empfehlungen bewährt. Sind auch für Sie geeignete Anregungen dabei?

#### **▣ Nutzen Sie Erinnerungshilfen, meiden Sie schwierige Situationen**

Sie helfen sich inzwischen häufiger, indem Sie Dinge in Ihrer Wohnung platzieren, die Sie an die Förderung Ihres seelischen Wohlbefindens erinnern und Menschen und Situationen, die Sie von Ihren Vorhaben abhalten könnten, meiden. Das ist sehr gut. Nutzen Sie dies weiterhin. Es wird Ihnen helfen, Ihre Absichten umzusetzen.

#### **▣ Lassen Sie sich unterstützen**

Nach wie vor nutzen Sie die Freiräume, die Ihr Umfeld Ihnen zur Förderung Ihres seelischen Wohlbefindens bietet. Wer Sie bei Ihren Vorhaben unterstützen kann, überlegen Sie sich genau. Sehr gut! Sprechen Sie diese Personen an und entscheiden Sie gemeinsam, wie die Unterstützung aussehen könnte.

#### **▣ Seien Sie stolz auf sich ...**

... wenn Sie es schaffen, regelmäßig Ihr seelisches Wohlbefinden zu fördern. Vor einigen Wochen ist Ihnen dies noch häufiger gelungen. Lassen Sie dieses Gefühl wieder öfter zu. Es wird Ihnen helfen, Ihren Glauben an die eigenen Fähigkeiten weiter zu stärken.

### **Ihre Zuversicht**

Untersuchungen belegen einen Zusammenhang zwischen der erfolgreichen Änderung von Gewohnheiten und unserer Zuversicht, dies zu schaffen. Heute sind Sie insgesamt eher unsicher, die Strategien zur Förderung Ihres seelischen Wohlbefindens erfolgreich umsetzen zu können. Hinsichtlich der weiteren erfolgreichen Umsetzung der Strategien, die Sie bereits anwenden, sind Sie jedoch zuversichtlich. Das ist eine gute Voraussetzung, um in Ihren Bemühungen auch zukünftig erfolgreich zu sein. Ihre Zuversicht zur Ausübung jeder einzelnen Strategie können Sie der Abbildung entnehmen.

#### **Ihre derzeitige Zuversicht, die Strategien (weiterhin) ausüben zu können ist ...**

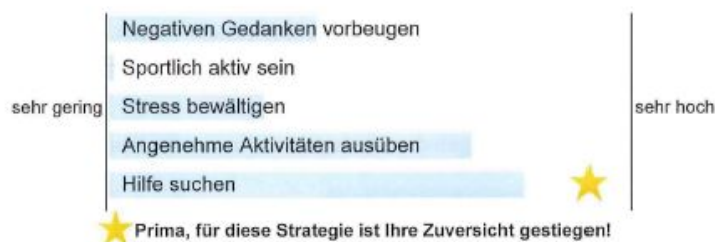

### **Werden Sie sich Ihrer Stärken bewusst.**

Eine gänzlich fehlende Zuversicht zur erfolgreichen Umsetzung äußern Sie nur für eine der fünf Strategien. Was genau hat Sie bei den anderen Strategien bewogen, Ihre Zuversicht nicht geringer einzuschätzen? Die Antwort auf diese Frage führt Sie zu Ihren Stärken. Wenn Sie möchten, versuchen Sie doch einmal, sie zu beantworten.



Sie haben nun viele Informationen erhalten, die Sie zur Forderung Ihres seelischen Wohlbefindens nutzen können. Im zweiten Teil unseres Briefes möchten wir Ihnen Rückmeldungen zum Thema gesundheitsvertraglicher Umgang mit Alkohol geben.

#### **Sie planen weniger Alkohol zu konsumieren – Wie kommen Sie weiter?**

Für Ihren "Tag X", ab dem Sie risikoarm trinken möchten, und die Zeit danach, kann es hilfreich sein, einige wichtige Vorbereitungen zu treffen. Die folgenden Empfehlungen haben sich in vielen Fällen bewährt. Ob auch für Sie geeignete Anregungen dabei sind, entscheiden Sie allein.

##### **■ Wer könnte unterstützen?**

Heute sprechen Sie mehr als früher mit anderen über Ihren Alkoholkonsum. Das ist gut, denn es sichert Ihnen eine Menge Unterstützung. Lassen Sie das weiter zu! Sie könnten Angehörigen und Freunden Ihren Entschluss, risikoarm Alkohol zu trinken, mitteilen. Und lassen Sie sich von ihnen ermutigen!

##### **■ Halten Sie an Ihrem Entschluss fest.**

Wie bei der ersten Befragung sagen Sie sich häufiger, dass Sie es schaffen können, weniger zu trinken. Das ist hilfreich, um den nächsten Schritt zu machen und risikoarm Alkohol zu trinken.

#### **Achtung: Kritische Situationen!**

Jeder trinkt in ganz bestimmten Situationen besonders gern ein alkoholisches Getränk. Diese machen es einem schwer, seine Trinkgewohnheiten zu verändern. Es ist daher wichtig, die eigenen kritischen Situationen zu kennen und richtig darauf zu reagieren.

Sie haben nach wie vor vergleichsweise wenig Zutrauen in Ihre Fertigkeiten, auch in kritischen Situationen bei Ihren Zielen zu bleiben. Für viele Menschen in einer vergleichbaren Situation hat es sich als hilfreich erwiesen, sich nochmals schwierige Situation vor Augen zu führen, die sie bereits erfolgreich gemeistert haben. Sie kennen Situationen, in denen Sie sich nicht zutrauen, Ihre Ziele einzuhalten. Überlegen Sie einmal: Was sind das für Situationen und wie können Sie mit diesen besser umgehen? Welche Alternativen zum Alkoholtrinken könnte es dabei für Sie geben?

Ihnen fällt es besonders in Situationen mit plötzlichem Verlangen nach Alkohol schwer, wenig bzw. keinen Alkohol zu trinken. Folgendes kann hilfreich sein:

- Lenken Sie sich ab
- Erinnern Sie sich an Ihre ursprünglichen Ziele und Erfolge
- Rufen Sie jemanden an, der/die Ihnen helfen kann

#### **Erstellen Sie einen Plan zum Einhalten der Grenzen risikoarmen Konsums**

Um zukünftig risikoarm zu trinken, ist es hilfreich einen Plan zu erstellen. Denken Sie dabei an Ihre kritischen Situationen. Überlegen Sie am besten jetzt: WANN, WO und WIE Sie die Grenzen risikoarmen Konsums einhalten möchten. Je konkreter dieser Plan ist, desto leichter wird es, ihn in den Alltag umzusetzen. Machen Sie es sich am Anfang nicht zu schwer, setzen Sie sich realistische Ziele!

Beispielsweise könnte sich eine junge Frau vornehmen, auf Partys höchstens 3 Gläser Wein mit 0,1 l zu trinken. Damit es ihr leichter fällt und um zu vermeiden, dass sie „auf dem Trockenen sitzt“, beschließt sie abwechselnd Wasser und Wein zu trinken (WIE). Damit möchte sie am nächsten Freitag (WANN) auf der Geburtstagsfeier ihrer Freundin (WO) beginnen. Oder eine Frau mittleren Alters, die jeden Tag zu Hause 2 große Bier zur Entspannung trinkt, entscheidet, dass sie ab dem nächsten Tag (WANN) in ihrem Supermarkt für zu Hause (WO) nur kleine Flaschen kauft und abends höchstens ein kleines Bier trinken wird (WIE).

Wie könnte solch ein Plan zum risikoarmen Konsum für Sie aussehen? Füllen Sie einfach die vorgegeben Zeilen aus und nehmen Sie sich fest vor, sich an Ihren Plan zu halten:

WANN?

---

WO?

---

WIE?

---

**Bleiben Sie am Ball!**

Wir hoffen, Ihnen auch mit diesem Brief wertvolle Informationen gegeben zu haben, die Sie für Ihr Wohlbefinden und Ihre Gesundheit nutzen können. Wir werden Sie weiterhin durch unsere wöchentliche SMS-Nachricht begleiten. In etwa 6 Wochen möchten wir Sie dann zu unserer dritten telefonischen Befragung einladen. Bleiben Sie neugierig!

Wir wünschen Ihnen, sehr geehrte Frau Doe, alles Gute und viel Erfolg!

Mit freundlichen Grüßen  
Ihr Gesünder Leben Team



Prof. Dr. C. Meyer



Dipl.-Psych. K. Krause



Dipl.-Psych. D. Gürtler

## Participant B: Letter 5

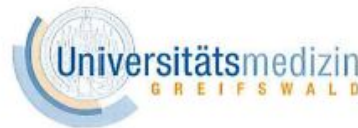

Institut für Sozialmedizin und Prävention, Walther-Rathenau-Str. 48, 17475 Greifswald

Institut für Sozialmedizin und Prävention  
Direktor: Prof. Dr. U. John

Ihr Ansprechpartner:

Frau  
Jane Doe  
XXXXXX 00  
00000 XXXXXX

Walther-Rathenau-Str. 48  
17475 Greifswald  
Telefon:  
Telefax:  
E-Mail:

Datum: 00. XXXXX 0000

### Ihre neue Rückmeldung zur Studie "Gesünder Leben"

**Sehr geehrte Frau Doe,**

vielen Dank, dass Sie an unserer dritten telefonischen Befragung teilgenommen haben. Sie erhalten nun eine neue persönliche Rückmeldung, in der wir Ihnen Veränderungen seit der letzten Befragung mitteilen.

#### Ihr seelisches Wohlbefinden

In den letzten 2 Monaten haben Sie keine Beeinträchtigungen Ihres seelischen Wohlbefindens erlebt. Bei unserer vorherigen Befragung haben Sie uns noch von mehreren Phasen berichtet, in denen Sie die Symptome einer Depression erlebt haben. Auch wenn es sich damals nicht um behandlungsbedürftige depressive Symptome handelte, freuen wir uns sehr für Sie, dass sich heute ein anderes Bild zeigt.

#### Seelisch im Gleichgewicht bleiben

Erinnern Sie sich noch an die fünf Strategien zur Förderung Ihres seelischen Wohlbefindens, die wir Ihnen vorgestellt haben? Diese waren:

1. Negativen Gedanken etwas Positives entgegensetzen
2. An den meisten Tagen der Woche sportlich aktiv sein
3. Regelmäßig etwas tun, um mit Stress besser umzugehen
4. Ausüben angenehmer Aktivitäten an den meisten Tagen der Woche
5. Sich Hilfe suchen, wenn Probleme Sie belasten

#### Wo stehen Sie?

Sie fördern weiterhin aktiv Ihr seelisches Wohlbefinden, indem Sie 2 der genannten Strategien in Ihren Alltag einbinden. Weiter so! Die Abbildung zeigt für jede Strategie Ihre aktuelle Motivation diese anzuwenden. Vielleicht können Sie diese neue Rückmeldung nutzen, um auch frühere Überlegungen noch einmal aufzufrischen und alte Vorhaben wieder aufzunehmen.

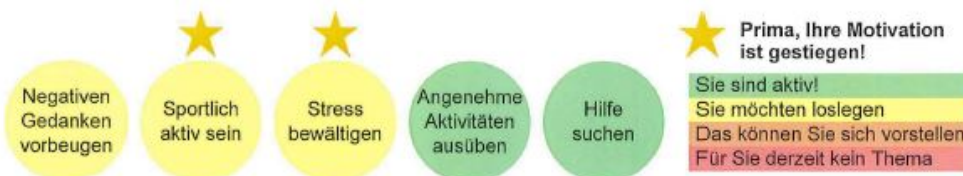



### Dem Wiederauftreten entgegenwirken

Depressive Erkrankungen verlaufen häufig in Phasen. Nicht selten kommt es nach vorübergehender Symptombfreiheit zum erneuten Auftreten depressiver Symptome. Deshalb ist es wichtig, das seelische Wohlbefinden auch in Zeiten, in denen man sich wohl und ausgeglichen fühlt, nicht zu vernachlässigen. Indem Sie bereits Strategien zur Förderung Ihres seelischen Wohlbefindens in Ihrem Alltag anwenden, tragen Sie entscheidend dazu bei, Ihr Risiko für das erneute Auftreten depressiver Symptome zu reduzieren.

Sie haben nun viele Informationen rund um Ihr seelisches Wohlbefinden und dessen Förderung erhalten. Im zweiten Teil unseres Briefes möchten wir uns nun wieder dem gesundheitsverträglichen Umgang mit Alkohol widmen.

### Wo stehen Sie?

Mittlerweile hat sich Ihr Entschluss, etwas an Ihrem Alkoholkonsum zu ändern, gefestigt und Sie versuchen, weniger Alkohol zu trinken. Damit sind Sie auf dem besten Weg zu einem gesundheitsbewussteren Leben! Um Ihnen die Durchsetzung Ihres Planes zu erleichtern, möchten wir Ihnen hiermit einige Anregungen geben, wie Sie dies langfristig durchhalten und mit schwierigen Situationen umgehen können.

### Erinnern Sie sich an die Grenzen risikoarmen Alkoholkonsums?

Gesunde Frauen sollten:

- insgesamt höchstens 7 kleine Getränke in der Woche
- und dabei höchstens 3 kleine Getränke zu einer Gelegenheit trinken.

Wenn Frauen 3 mal in der Woche Alkohol trinken, sollten sie höchstens 2 kleine Getränke am Tag trinken. Wenn Sie mit Alkohol unvereinbare Medikamente nehmen oder wenn Ihnen ein Arzt vom Alkoholkonsum abgeraten hat, dann sollten Sie gänzlich darauf verzichten.

Ein kleines  
Getränk  
beinhaltet:

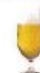

0,25 – 0,3 l Bier

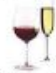

0,1 – 0,15 l  
Wein/Sekt

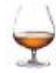

4 cl Spirituosen

### Ihre Trinkmenge im Vergleich

Wenn Sie wissen möchten, wie viel Sie nun im Vergleich zu anderen Frauen trinken, können Sie dies der Abbildung entnehmen. Ihr Alkoholkonsum pro Woche liegt innerhalb des dunklen Tortenstücks.

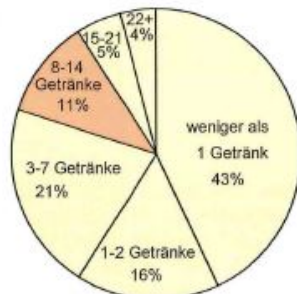

Damit trinken sie mehr Alkohol als 80% der Frauen zwischen 18 und 65 Jahren

Verglichen mit Ihren Angaben der letzten Befragung haben Sie die Anzahl alkoholischer Getränke pro Woche kaum verändert.

### Einschätzung Ihres persönlichen Risikos

Die Abbildung zeigt, wie hoch bei Ihrem Alkoholkonsum das Risiko für negative Folgen ist. Berücksichtigt sind gesundheitliche, psychische und soziale Folgen.

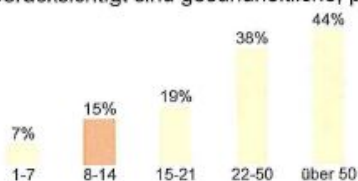

Personen mit der von Ihnen angegebenen Trinkmenge müssen mit einer Wahrscheinlichkeit von etwa 15% mit negativen Folgen des Alkoholkonsums rechnen.

Damit hat sich Ihr persönliches Risiko nicht verändert.

### Keine zu hohe Trinkmenge zu einer Gelegenheit

Es ist Ihnen gelungen, weiterhin nicht mehr als 3 kleine Getränke zu einer Gelegenheit zu trinken. Das ist sehr gut! Vielleicht fällt es Ihnen dadurch leichter, zudem wieder pro Woche nicht mehr als insgesamt 7 kleine Getränke zu trinken.

### Für Sie überwiegen nach wie vor die angenehmen Seiten des Alkoholtrinkens.

Sie machen sich nicht so viele Gedanken über die unangenehmen Seiten oder empfinden die angenehmen Seiten des Alkoholtrinkens als wichtiger. Das finden Sie gut am Alkoholtrinken: Es hilft Ihnen zu entspannen; sich bei einem geselligen Beisammensein nicht ausgeschlossen zu fühlen und ein lustigerer Mensch zu sein.

Gut ist, dass Sie die folgenden Nachteile riskanten Alkoholkonsums in Ihre Entscheidung, Alkohol zu trinken oder nicht zu trinken, einfließen lassen:

- Sie schaden Ihrer Gesundheit.
- Sie sind körperlich weniger leistungsfähig.
- Sie nehmen an Körpergewicht zu.

### **Im Vergleich zu anderen Menschen ...**

... finden Sie die unangenehmen Seiten nicht so bedeutsam. Erstellen Sie doch einmal Ihre persönliche Pro-Kontra-Liste. Welche anderen Nachteile hat das Alkoholtrinken für Sie? Welche Vorteile bringt es, wenn Sie risikoarm trinken? Hängen Sie die Liste gut sichtbar auf und ergänzen Sie diese, sobald Ihnen neue Argumente einfallen.

Oft ist es interessant zu überlegen, welche der angenehmen oder unangenehmen Seiten Ihnen momentan am wichtigsten sind. Danach könnten Sie überlegen, welche Ihnen langfristig mehr Vorteile bringen könnten.

### **Bleiben Sie am Ball!**

Auf dem Weg zu einem gesunden Leben sind Sie weit fortgeschritten. Sie haben es geschafft, seit einiger Zeit Strategien zur Förderung Ihres seelischen Wohlbefindens in Ihren Alltag zu integrieren. Das ist ein sehr schöner Erfolg und wir gratulieren Ihnen herzlich! Gleichzeitig versuchen Sie, weniger Alkohol zu trinken. Ein entscheidender Schritt, auch wenn es Ihnen manchmal noch schwer fällt. Wir hoffen, Ihnen hilfreiche Informationen gegeben zu haben, die Sie für Ihr Wohlbefinden und Ihre Gesundheit nutzen können. In den nächsten Tagen werden wir Ihnen einen weiteren Brief zukommen lassen, mit Empfehlungen, die Sie auf Ihrem weiteren Weg unterstützen sollen.

Bis dahin wünschen wir Ihnen, sehr geehrte Frau Doe, alles Gute!

Mit freundlichen Grüßen  
Ihr Gesünder Leben Team



Prof. Dr. C. Meyer



Dipl.-Psych. K. Krause



Dipl.-Psych. D. Gürtler

## Participant B: Letter 6

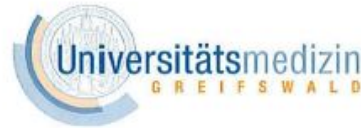

Institut für Sozialmedizin und Prävention, Walther-Rathenau-Str. 48, 17475 Greifswald

Institut für Sozialmedizin und Prävention  
Direktor: Prof. Dr. U. John

Ihr Ansprechpartner:

Walther-Rathenau-Str. 48  
17475 Greifswald  
Telefon:  
Telefax:  
E-Mail:

Datum: 00. XXXXX 0000

Frau  
Jane Doe  
XXXXXX 00  
00000 XXXXXX

### Ihre neue Rückmeldung zur Studie "Gesünder Leben"

Sehr geehrte Frau Doe,

hiermit erhalten Sie den zweiten Teil Ihrer persönlichen Rückmeldung zu Ihren Angaben aus der dritten telefonischen Befragung.

Die Abbildung zeigt noch einmal Ihre Motivation zur Anwendung der Strategien. Sie tun bereits einiges für Ihr seelisches Wohlbefinden, indem Sie 2 der genannten Strategien in Ihrem Alltag nutzen.

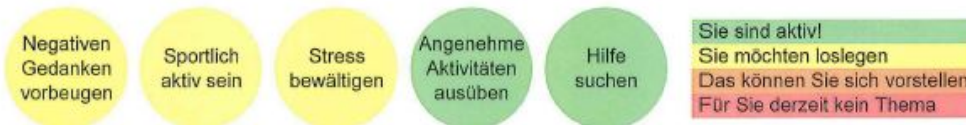

### Was treibt Sie an?

Die Verbesserung Ihres seelischen Wohlbefindens kann ein entscheidender Antrieb bei der Veränderung Ihrer Gewohnheiten sein. Insgesamt können Sie sich nach wie vor vorstellen, dass sich die fünf Strategien positiv auf Ihr seelisches Wohlbefinden auswirken. Dass sich die Strategien, die Sie bereits anwenden, positiv auf dieses auswirken, können Sie sich ebenfalls vorstellen. Dies wird Ihnen helfen am Ball zu bleiben.

Die Abbildung zeigt Ihnen für jede Strategie, inwieweit Sie Verbesserungen Ihres seelischen Wohlbefindens durch deren Anwendung erwarten. Wie Sie sehen, trauen Sie positive Einflüsse nicht nur den Strategien zu, die Sie bereits anwenden. Vielleicht ein Argument dafür, auch bei anderen Strategien einen nächsten Schritt zu wagen.

Zurzeit halten Sie positive Auswirkungen der Strategien auf Ihr seelisches Wohlbefinden für ...

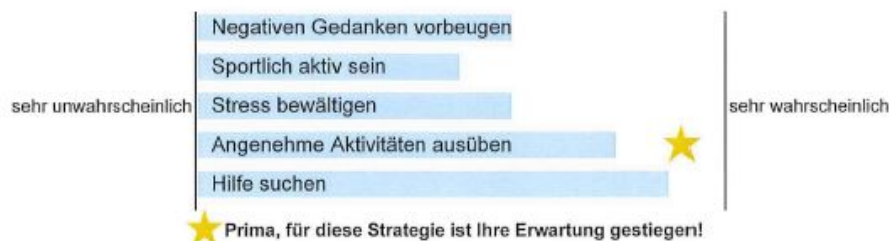



Es kann nützlich sein sich zu überlegen, welche weiteren Vorteile die Strategien zur Förderung des seelischen Wohlbefindens für Sie persönlich bereithalten könnten. Vielleicht fallen Ihnen Punkte ein, an die Sie bisher noch gar nicht gedacht haben, die Ihnen jedoch wichtig sind. Dies kann Ihnen helfen, Sie in Ihren Absichten zu bestärken.

#### **Sie fördern bereits Ihr seelisches Wohlbefinden – Wie kommen Sie weiter?**

Es gibt eine ganze Reihe von Tricks und Techniken, die Sie bei der langfristigen Förderung Ihres seelischen Wohlbefindens unterstützen können. Bei vielen Menschen haben sich die folgenden Empfehlungen bewährt. Sind auch für Sie geeignete Anregungen dabei?

##### **▣ Lassen Sie sich unterstützen**

Sie nutzen die Freiräume, die Ihr Umfeld Ihnen zur Förderung Ihres seelischen Wohlbefindens bietet und überlegen sich genau, wer Sie bei Ihren Vorhaben unterstützen kann. Inzwischen nutzen Sie diese Dinge häufiger als noch vor einigen Wochen. Sehr gut! Machen Sie das auch in Zukunft.

##### **▣ Seien Sie stolz auf sich**

Gerade in der heutigen, oft stressigen Zeit ist es nicht selbstverständlich, sich regelmäßig Zeit zur Förderung seines seelischen Wohlbefindens zu nehmen. Inzwischen wissen Sie Ihre eigenen Leistungen zu schätzen. Sie sind zu Recht stolz auf sich, wenn Sie es schaffen, sich die Zeit zur Förderung Ihres seelischen Wohlbefindens zu nehmen. Erinnern Sie sich an dieses gute Gefühl, wenn es Ihnen mal schwerer fällt, sich aufzuraffen.

##### **▣ Halten Sie an Ihrem Entschluss fest**

Ihnen ist inzwischen häufiger bewusst, dass Sie Ihr seelisches Wohlbefinden verbessern können, wenn Sie es wollen. Das ist sehr hilfreich, um Ihre Pläne dauerhaft erfolgreich umzusetzen.

#### **Ihre Zuversicht**

Untersuchungen belegen einen Zusammenhang zwischen der erfolgreichen Änderung von Gewohnheiten und unserer Zuversicht, dies zu schaffen. Insgesamt sind Sie mittlerweile zuversichtlich, die Strategien zur Förderung Ihres seelischen Wohlbefindens erfolgreich umsetzen zu können. Die weitere erfolgreiche Umsetzung der Strategien, die Sie bereits anwenden, trauen Sie sich ebenfalls zu. Das ist eine gute Voraussetzung, um in Ihren Bemühungen auch zukünftig erfolgreich zu sein. Ihre Zuversicht zur Ausübung jeder einzelnen Strategie können Sie der Abbildung entnehmen. Wie Sie sehen, sind die Strategien, die Sie bereits anwenden, nicht die einzigen, deren erfolgreiche Umsetzung Sie sich zutrauen. Dies mag ein weiteres Argument dafür sein, zusätzliche Schritte zur Förderung des seelischen Wohlbefindens zu unternehmen. Entscheiden Sie selbst, wie viel Sie leisten können.

#### **Ihre derzeitige Zuversicht, die Strategien (weiterhin) ausüben zu können ist ...**

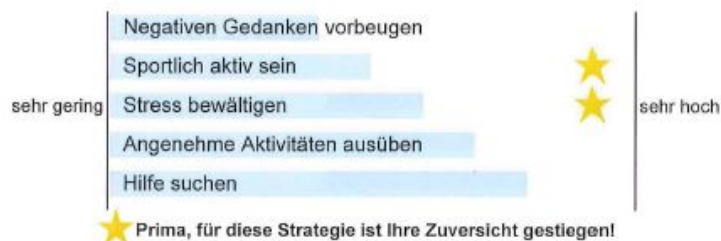

### **Werden Sie sich Ihrer Stärken weiterhin bewusst.**

Heute gibt es keine Strategie mehr, für deren erfolgreiche Umsetzung es Ihnen grundsätzlich an Zuversicht fehlt. Um sich Ihrer Stärken weiterhin bewusst zu werden, führen Sie sich erneut vor Augen, was Sie bewogen hat, Ihre Zuversicht nicht geringer einzuschätzen. Überlegen Sie auch noch einmal, welche Ihrer Stärken und Eigenschaften Ihnen bei früheren Herausforderungen geholfen haben. Inwieweit konnten diese auch jetzt behilflich sein?

Sie haben nun viele Informationen erhalten, die Sie zur Förderung Ihres seelischen Wohlbefindens nutzen können. Im zweiten Teil unseres Briefes möchten wir den Schwerpunkt nun wieder auf den gesundheitsvertraglichen Umgang mit Alkohol lenken.

### **Sie konsumieren bereits weniger Alkohol – Wie kommen Sie weiter?**

Auch für den risikoarmen Konsum gibt es eine ganze Reihe von Tricks und Strategien, die Sie dabei unterstützen können, Ihren Erfolg zu sichern. Bei vielen Menschen haben sich die folgenden Empfehlungen bewährt. Sind auch für Sie geeignete dabei?

#### **▣ Vermeiden Sie schwierige Situationen.**

Manchen Menschen hilft es, Dingen oder Situationen, die sie verleiten, (zu viel) Alkohol zu trinken, aus dem Weg zu gehen. Könnte das auch Ihnen helfen, damit Sie (auch) zukünftig risikoarm Alkohol trinken? In welchen Situationen könnte es weiterhin schwierig sein? Wie konnten Sie diese vermeiden?

#### **▣ Halten Sie an Ihrem Entschluss fest.**

Wie bei der letzten Befragung sagen Sie sich häufiger, dass Sie es schaffen können, weniger zu trinken. Das ist hilfreich, um dauerhaft weniger zu trinken und die Grenzen risikoarmen Konsums einzuhalten.

### **Achtung: Kritische Situationen!**

Wenn man den Alkoholkonsum reduziert hat und nicht in alte Gewohnheiten zurückfallen möchte, ist es wichtig, Situationen zu kennen, in denen es einem schwer fallen könnte, wenig bzw. gar nicht zu trinken. Diese Situationen treten mit Sicherheit wieder auf und erfordern ein angemessenes Verhalten.

Sie haben ein vergleichsweise hohes Zutrauen in Ihre Fertigkeiten, auch in kritischen Situationen bei Ihren Zielen zu bleiben. In den letzten zwei Monaten ist Ihre Zuversicht noch größer geworden. Das kann Sie auf Ihrem Weg zu einem gesundheitsbewussteren Leben unterstützen. Seien Sie jedoch insbesondere in der ersten Zeit in kritischen Situationen, wie z. B. auf Feiern, noch vorsichtig.

Ihnen fällt es besonders in guter Stimmung und in sozialen Situationen schwer, wenig bzw. keinen Alkohol zu trinken. Folgendes kann hilfreich sein:

- Meiden Sie zunächst Situationen, in denen viel Alkohol getrunken wird.
- Überlegen Sie sich vorher, wie viel Gläser Alkohol Sie maximal trinken möchten.
- Weisen Sie Angebote, Alkohol zu trinken, deutlich zurück.

### **Bleiben Sie am Ball!**

Wir hoffen, Ihnen auch mit diesem Brief wertvolle Informationen gegeben zu haben, die Sie für Ihr Wohlbefinden und Ihre Gesundheit nutzen können. Wir werden Sie weiterhin durch unsere wöchentliche SMS-Nachricht begleiten. In etwa 7 Wochen möchten wir Sie dann zu unserer vierten telefonischen Befragung einladen. Bleiben Sie neugierig!

Wir wünschen Ihnen, sehr geehrte Frau Doe, alles Gute und viel Erfolg!

Mit freundlichen Grüßen  
Ihr Gesünder Leben Team



Prof. Dr. C. Meyer



Dipl.-Psych. K. Krause



Dipl.-Psych. D. Gürtler



## References

- 1 Velicer WF, Prochaska JO, Bellis JM, DiClemente CC, Rossi JS, Fava JL, Steiger JH: An expert system intervention for smoking cessation. *Addict Behav* 1993;18:269-290.
- 2 Prochaska JO, Velicer WF: The transtheoretical model of health behavior change. *Am J Health Promot* 1997;12:38-48.
- 3 Levesque DA, Van Marter DF, Schneider RJ, Bauer MR, Goldberg DN, Prochaska JO, Prochaska JM: Randomized trial of a computer-tailored intervention for patients with depression. *Am J Health Promot* 2011;26:77-89.
- 4 Busch MA, Maske UE, Ryl L, Schlack R, Hapke U: Prevalence of depressive symptoms and diagnosed depression among adults in Germany. Results of the German Health Interview and Examination Survey for Adults (DEGS1). *Bundesgesundheitsblatt Gesundheitsforschung Gesundheitsschutz* 2013;56:733-739.
- 5 Freyer-Adam J, Baumann S, Haberecht K, Tobschall S, Bischof G, John U, Gaertner B: In-Person Alcohol Counseling Versus Computer-Generated Feedback: Results From a Randomized Controlled Trial. *Health Psychol* 2018;37:70-80.
- 6 Gander F, Proyer RT, Ruch W, Wyss T: Strength-Based Positive Interventions: Further Evidence for Their Potential in Enhancing Well-Being and Alleviating Depression. *J Happiness Stud* 2013;14:1241-1259.
- 7 Nolen-Hoeksema S: Responses to depression and their effects on the duration of depressive episodes. *J Abnorm Psychol* 1991;100:569-582.
- 8 Cuijpers P, van Straten A, Warmerdam L: Behavioral activation treatments of depression: A meta-analysis. *Clin Psychol Rev* 2007;27:318-326.
- 9 Mazzucchelli T, Kane R, Rees C: Behavioral activation treatments for depression in adults: a meta-analysis and review. *Clin Psychol-Sci Pr* 2009;16:383-411.
- 10 Stetter F, Kupper S: Autogenic Training: A Meta-Analysis of Clinical Outcome Studies. *Appl Psychophysiol Biofeedback* 2002;27:45-98.
- 11 Li Y, Wang R, Tang J, Chen C, Tan L, Wu Z, Yu F, Wang X: Progressive muscle relaxation improves anxiety and depression of pulmonary arterial hypertension patients. *Evid Based Complement Alternat Med* 2015;2015:792895.
- 12 Mino Y, Babazono A, Tsuda T, Yasuda N: Can stress management at the workplace prevent depression? A randomized controlled trial. *Psychother Psychosom* 2006;75:177-182.
- 13 Josefsson T, Lindwall M, Archer T: Physical exercise intervention in depressive disorders: Meta-analysis and systematic review. *Scand J Med Sci Sports* 2014;24:259-272.
- 14 Stathopoulou G, Powers MB, Berry AC, Smits JAJ, Otto MW: Exercise Interventions for Mental Health: A Quantitative and Qualitative Review. *Clin Psychol-Sci Pr* 2006;13:179-193.
- 15 Schuch FB, Vancampfort D, Firth J, Rosenbaum S, Ward PB, Silva ES, Hallgren M, De Leon AP, Dunn AL, Deslandes AC, Fleck MP, Carvalho AF, Stubbs B: Physical Activity and Incident Depression: A Meta-Analysis of Prospective Cohort Studies. *Am J Psychiatry* 2018;175:631-648.
- 16 Seligman ME, Steen TA, Park N, Peterson C: Positive psychology progress: empirical validation of interventions. *Am Psychol* 2005;60:410.
